# Supplementary material for: Target and Non-Target Analysis of Polycyclic Aromatic Hydrocarbons and Emerging Aromatic Contaminants in Outdoor Dust from a Petrochemical-Impacted Residential Area
Source: MDPI journal article supplement (doi:10.3390/toxics14030223), 2026-03-05
Supplement: s1 [file toxics-4155753-supplementary.pdf › toxics-4155753-supplementary.pdf]

## **Supplementary Information**

### **Target and Non-Target Analysis of Polycyclic Aromatic Hydrocarbons and Emerging Aromatic Contaminants in Outdoor Dust from a Petrochemical-Impacted Residential Area**

**Yimeng Si <sup>a, b</sup>, Siyuan Li <sup>b</sup>, Yu Wang <sup>b, c, \*</sup>, Hao Chen <sup>b</sup>, Yanlong Zhang <sup>b</sup>, Shaoping**

**Kuang <sup>a, \*</sup>, Hongwen Sun <sup>b</sup>**

<sup>a</sup> College of Environment and Safety Engineering, Qingdao University of Science and Technology, Qingdao 266042, China

<sup>b</sup> MOE Key Laboratory of Pollution Processes and Environmental Criteria, College of Environmental Science and Engineering, Nankai University, Tianjin 300350, China

<sup>c</sup> Guangdong-Hong Kong-Macao Greater Bay Area Environmental Technology Research Center, Shenzhen Research Institute of Nankai University, Shenzhen 518063, China

**\*Corresponding Authors:**

Y. Wang (yu.wang@nankai.edu.cn) and S. P. Kuang (spkuang@qust.edu.cn)

Total pages: 42

Number of tables: 14

Number of figures: 2

## Contents

|                                                                                                                                               |    |
|-----------------------------------------------------------------------------------------------------------------------------------------------|----|
| Text S1. Sources of laboratory consumables and reagents.....                                                                                  | 3  |
| Text S2. Sample preparation and instrument analysis .....                                                                                     | 3  |
| Text S3. Workflow for non-target screening .....                                                                                              | 4  |
| Table S1. Chemical properties of target PAHs and their derivatives.....                                                                       | 6  |
| Table S2. Basic information on internal standards used in the study. ....                                                                     | 14 |
| Table S3. Sampling sites information.....                                                                                                     | 14 |
| Table S4. Instrumental parameters of GC-HRMS.....                                                                                             | 15 |
| Table S5. Procedure blanks, matrix spiked recoveries, and method detection limits (MDLs) of target PAHs and derivatives.....                  | 16 |
| Table S6. Detail parameters of <i>GC EI with Statistics</i> . ....                                                                            | 18 |
| Table S7. Evaluation of Matrix Effects (ME) in Non-Targeted Screening.....                                                                    | 19 |
| Table S8. Literature reference values for TEFs used in TEQs calculation. ....                                                                 | 20 |
| Table S9. Parameters and references required for calculation of incremental lifetime cancer risk (ILCR). ....                                 | 21 |
| Table S10. Concentrations and detection frequency (DF) of target PAHs and their derivatives in dust samples. ....                             | 22 |
| Table S11. Twenty-nine PACs identified by GC-Orbitrap-HRMS non-target screening analysis .....                                                | 24 |
| Table S12. The LC <sub>50</sub> (mg/L) of target and screening abbreviations for soil organisms (earthworm) and aquatic organisms (fish)..... | 28 |
| Table S13. TEQs for target contaminants.....                                                                                                  | 32 |
| Table S14. The results of ILCR analysis. ....                                                                                                 | 34 |
| Figure S1. The sampling sites distribution. ....                                                                                              | 35 |
| Figure S2. Chromatogram (left) and mass spectrum (right) of 29 identified PACs. ....                                                          | 36 |
| References .....                                                                                                                              | 42 |

## **Text S1. Sources of laboratory consumables and reagents**

The mixed standard for the 16 parent PAHs was purchased from Manji Biotechnology Co., Ltd. (Beijing, China), while the mixed surrogate internal standard and individual standards for various derivatives were obtained from ANPEL Laboratory Technology Inc. (Shanghai, China). Solid-phase extraction (SPE) was performed using CNWBOND Si columns (1 g, 6 mL) purchased from ANPEL Laboratory Technology Co., Ltd. (Shanghai, China). Hydrophobic PTFE needle filters were obtained from Ampere Laboratory Supplies (Shanghai, China). HPLC-grade solvents (hexane, dichloromethane, and methanol) were supplied by ANPEL Laboratory Technology Co., Ltd. (Shanghai, China), while HPLC-grade acetone was purchased from Kangde Technology Co., Ltd. (Tianjin, China). Deionized water was prepared using the Milli-Q Reference water purification system from Merck KGaA (Darmstadt, HE, Germany).

## **Text S2. Sample preparation and instrument analysis**

### **Quantitative analysis:**

An aliquot of 100 mg dust sample was transferred into a 40 mL EPA vial, followed by the addition of mixed internal standards (20 ppb). Subsequently, 10 mL of hexane–acetone (v:v = 1:1) was added. The mixture was ultrasonicated at 25 °C for 30 min at full power and then centrifuged at 2860 g for 5 min. The supernatant was collected, and the extraction procedure was repeated once. The combined extracts were concentrated to approximately 1 mL under a gentle nitrogen stream. Target compounds were separated and enriched using solid-phase extraction (SPE). A silica gel mini-column was preconditioned with 5 mL dichloromethane and equilibrated twice with 5 mL n-hexane. The concentrated extract was loaded onto the column, followed by two elutions with 2 mL n-hexane and two elutions with n-hexane–dichloromethane (v:v = 1:1). The combined eluate was evaporated to near dryness under nitrogen and reconstituted in 1 mL n-hexane. The final solution was filtered through a 0.22 µm PTFE membrane, transferred to an autosampler vial, and stored at –20 °C prior to instrumental analysis.

### **Non-target screening analysis:**

For non-target screening, sequential extraction was performed using solvents of increasing polarity: 10 mL methanol, 10 mL hexane–acetone (v:v = 1:1), and 10 mL ethyl acetate. Each extraction involved shaking at 1800 rpm for 10 min, ultrasonication at 25 °C for 30 min, and centrifugation at 2860 g for 5 min. The combined extracts (30 mL) were further clarified by high-speed centrifugation at 4 °C and 13,000 rpm for 10 min to remove fine particulates. The supernatant was transferred to a sample vial using a glass pipette and stored at –20 °C for subsequent analysis.

### **Instrumental analysis:**

Chemical separation was performed using a TG-5MS capillary column (30 m  $\times$  0.25 mm, 0.25  $\mu$ m, Thermo Fisher Scientific, MA, USA) installed on a GC-Orbitrap HRMS system (Trace 1610 gas chromatograph/Orbitrap Exploris GB 10090, Thermo Fisher Scientific<sup>TM</sup>). Samples were injected in splitless mode using a 2  $\mu$ L injection volume, with a carrier gas flow rate of 1.0 mL/min and an injection port temperature of 260 °C. The GC oven temperature program was as follows: initial temperature of 40 °C, held for 1.5 min; Ramp at 25 °C/min to 90 °C, held for 1.5 min; Ramp at 25 °C/min to 180 °C; Ramp at 5 °C/min to 280 °C, held for 1.5 min; Final ramp at 10 °C/min to 310 °C, held for 10 min; Total runtime of 44.60 min. The transfer line temperature was set at 280 °C, ion source temperature at 250 °C, with the electron energy of 70 eV and emission current of 50  $\mu$ A. The instrument was operated in full scan mode over a mass range of  $m/z$  50–750, with a mass resolution of 30,000. The automatic gain control was set to “Standard,” and the maximum ion injection time was set to “AUTO”.

### **Text S3. Workflow for non-target screening**

Import the raw measured data into Compound Discoverer software and apply its built-in “GC EI with Statistics” workflow after minor adjustments. The screening process for unknown compounds is as follows:

(1) Set preliminary screening parameters for unknown peaks: mass error < 10 ppm, signal-to-noise ratio (S/N) > 3, peak smoothing points > 9, minimum total ion current (TIC) > 10<sup>6</sup>, and ion overlap window > 95%.

(2) Align suspect peaks across different samples based on spectrum dot product and retention times, with a maximum retention time deviation of 5 seconds and a minimum dot product threshold of 500.

(3) After preliminary separation of unknown peaks, perform initial substance identification using databases including the National Institute of Standards and Technology (NIST) “mainlib” and “replib,” along with two in-house GC-Orbitrap databases (“gc-orbitrap contaminants library v1.5” and “gc-orbitrap other environmental”). Retain substances with a search index greater than 600.

(4) After subtracting background noise peaks, peak areas were normalized using the “Constant Median” algorithm, and missing values were imputed using the “Median + Small Value with Variability” algorithm.

(5) Retain peaks with a sample-to-blank ratio greater than 5 as candidate peaks. Based on the preliminary structural predictions from matches, the final exported substance list includes only compounds exhibiting aromatic structural features. Record their retention times,  $m/z$  values, provisional molecular formulas, and names.

(6) Spectral and structural confirmation of candidate compounds was performed using Qual Browser in Xcalibur 4.6 software, along with NIST MS Search and MS Interpreter. Qual Browser extracted compound spectra from raw data; NIST MS Search performed database spectral matching, retaining candidates with the highest “Match” and “R.Match” scores and minimal deviation; MS Interpreter conducted fragment prediction and structural interpretation.

Based on the CL evaluation framework with adjustments, the final confidence levels for pollutant identification are defined as follows:

CL=3: Search index  $\geq 600$ , mass error  $< 5$  ppm, incomplete mass spectra and fragment evidence, no RI recorded in the database or  $\Delta RI > 20$ ;

CL=2b:  $\Delta RI < 20$ , incomplete mass spectra and fragment evidence;

CL=2a: Spectrum matches library, and the calculated  $\Delta RI < 20$ .

The calculation formula for Kováts RI is as follows:

$$RI = 100[z + \frac{\log_{10}RT(x) - \log_{10}RT(z)}{\log_{10}RT(z+1) - \log_{10}RT(z)}]$$

where RI is the retention index of unknown compound x, z is the number of carbon atoms in the n-alkane eluted before unknown compound x, z + 1 is the number of carbon atoms in the n-alkane eluted after unknown compound x, and RT(x), RT(z), and RT(z+1) are the retention times corresponding to the substances, respectively.

Table S1. Chemical properties of target PAHs and their derivatives

| Chemicals      | Abbreviation | CAS#     | Formula                         | M.W.   | Structure                                                                           | Solubility<br>(mg L <sup>-1</sup> )<br>25 °C | Vapor<br>pressure<br>(mmHg)<br>25 °C | Henry's law<br>constant<br>(atm/m <sup>3</sup> /mol)<br>25 °C | log <i>K</i> <sub>ow</sub> | log <i>K</i> <sub>oc</sub> | log <i>K</i> <sub>OA</sub> | Half-life time (h)<br>(Level III Fugacity Model;<br>Air/Water/Soil/Sediment) | BCF<br>(L kg <sup>-1</sup> ) |
|----------------|--------------|----------|---------------------------------|--------|-------------------------------------------------------------------------------------|----------------------------------------------|--------------------------------------|---------------------------------------------------------------|----------------------------|----------------------------|----------------------------|------------------------------------------------------------------------------|------------------------------|
| PAHs           |              |          |                                 |        |                                                                                     |                                              |                                      |                                                               |                            |                            |                            |                                                                              |                              |
| Naphthalene    | NAP          | 91-20-3  | C <sub>10</sub> H <sub>8</sub>  | 128.17 | 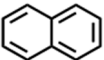   | 142                                          | 8.50E-2                              | 4.40E-4                                                       | 3.30                       | 2.86                       | 5.19                       | 11.9/900/1.8E3/8.1E3                                                         | 69.9                         |
| Acenaphthylene | ACY          | 208-96-8 | C <sub>12</sub> H <sub>8</sub>  | 152.19 |    | 2.49                                         | 6.68E-3                              | 1.14E-4                                                       | 3.94                       | 3.42                       | 6.27                       | 0.744/360/720/3.24E3                                                         | 185                          |
| Acenaphthene   | ACE          | 83-32-9  | C <sub>12</sub> H <sub>10</sub> | 154.21 |    | 2.53                                         | 2.15E-3                              | 1.84E-4                                                       | 3.92                       | 3.40                       | 6.31                       | 4.43/900/1.8E3/8.1E3                                                         | 179                          |
| Fluorene       | FLO          | 86-73-7  | C <sub>13</sub> H <sub>10</sub> | 166.22 |    | 1.34                                         | 6.00E-4                              | 9.62E-5                                                       | 4.18                       | 3.63                       | 6.79                       | 19.7/360/720/3.24E3                                                          | 266                          |
| Phenanthrene   | PHE          | 1985/1/8 | C <sub>14</sub> H <sub>10</sub> | 178.23 |    | 0.68                                         | 1.21E-4                              | 4.23E-5                                                       | 4.46                       | 3.87                       | 7.57                       | 19.7/1.44E3/2.88E3/1.3E4                                                     | 1865                         |
| Anthracene     | ANT          | 120-12-7 | C <sub>14</sub> H <sub>10</sub> | 178.23 |   | 0.69                                         | 6.53E-6                              | 5.56E-5                                                       | 4.45                       | 3.86                       | 7.55                       | 6.42/1.44E3/2.88E3/1.3E4                                                     | 401                          |
| Fluoranthene   | FLT          | 206-44-0 | C <sub>16</sub> H <sub>10</sub> | 202.25 |  | 0.13                                         | 9.22E-6                              | 8.86E-6                                                       | 5.16                       | 4.48                       | 8.88                       | 23.3/1.44E3/2.88E3/1.3E4                                                     | 1179                         |
| Pyrene         | PYR          | 129-00-0 | C <sub>16</sub> H <sub>10</sub> | 202.25 |  | 0.22                                         | 4.50E-6                              | 1.19E-5                                                       | 4.88                       | 4.24                       | 8.80                       | 5.13/1.44E3/2.88E3/1.3E4                                                     | 771                          |

| Chemicals               | Abbreviation | CAS#     | Formula                         | M.W.   | Structure                                                                           | Solubility<br>(mg L <sup>-1</sup> )<br>25 °C | Vapor<br>pressure<br>(mmHg)<br>25 °C | Henry's law<br>constant<br>(atm/m <sup>3</sup> /mol)<br>25 °C | log <i>K</i> <sub>OW</sub> | log <i>K</i> <sub>OC</sub> | log <i>K</i> <sub>OA</sub> | Half-life time (h)<br>(Level III Fugacity Model;<br>Air/Water/Soil/Sediment) | BCF<br>(L kg <sup>-1</sup> ) |
|-------------------------|--------------|----------|---------------------------------|--------|-------------------------------------------------------------------------------------|----------------------------------------------|--------------------------------------|---------------------------------------------------------------|----------------------------|----------------------------|----------------------------|------------------------------------------------------------------------------|------------------------------|
| Benzo[a]anthracene      | BaA          | 56-55-3  | C <sub>18</sub> H <sub>12</sub> | 228.29 | 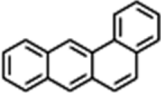   | 0.03                                         | 2.10E-7                              | 1.20E-5                                                       | 5.76                       | 5.00                       | 9.07                       | 5.13/1.44E3/2.88E3/1.3E4                                                     | 2934                         |
| Chrysene                | CHR          | 218-01-9 | C <sub>18</sub> H <sub>12</sub> | 228.29 |    | 0.03                                         | 6.23E-9                              | 5.23E-6                                                       | 5.81                       | 5.04                       | 9.48                       | 5.13/1.44E3/2.88E3/1.3E4                                                     | 3165                         |
| Benzo[b]fluoranthene    | BbF          | 205-99-2 | C <sub>20</sub> H <sub>12</sub> | 252.31 |    | 0.02                                         | 5.00E-7                              | 6.57E-7                                                       | 5.78                       | 5.02                       | 10.4                       | 13.8/1.44E3/2.88E3/1.3E4                                                     | 3024                         |
| Benzo[k]fluoranthene    | BkF          | 207-08-9 | C <sub>20</sub> H <sub>12</sub> | 252.31 |    | 0.01                                         | 9.65E-10                             | 5.84E-7                                                       | 6.11                       | 5.30                       | 10.7                       | 4.79/1.44E3/2.88E3/1.3E4                                                     | 4993                         |
| Benzo[a]pyrene          | BaP          | 50-32-8  | C <sub>20</sub> H <sub>12</sub> | 252.31 |    | 0.01                                         | 5.49E-9                              | 4.57E-7                                                       | 6.13                       | 5.32                       | 10.9                       | 5.13/1.44E3/2.88E3/1.3E4                                                     | 5147                         |
| Ideno-[1,2,3-c,d]pyrene | IcdP         | 193-39-5 | C <sub>22</sub> H <sub>12</sub> | 276.33 |  | 2.00E-3                                      | 1.25E-10                             | 3.48E-7                                                       | 6.70                       | 5.82                       | 11.6                       | 3.98/1.44E3/2.88E3/1.3E4                                                     | 1.22E4                       |
| Dibenzo[a,h]anthracene  | DahA         | 53-70-3  | C <sub>22</sub> H <sub>14</sub> | 278.35 |  | 3.00E-3                                      | 9.55E-10                             | 1.41E-7                                                       | 6.75                       | 5.68                       | 11.8                       | 5.13/1.44E3/2.88E3/1.3E4                                                     | 9596                         |

| Chemicals               | Abbreviation | CAS#      | Formula                                       | M.W.   | Structure                                                                           | Solubility<br>(mg L <sup>-1</sup> )<br>25 °C | Vapor<br>pressure<br>(mmHg)<br>25 °C | Henry's law<br>constant<br>(atm/m <sup>3</sup> /mol)<br>25 °C | log <i>K</i> <sub>OW</sub> | log <i>K</i> <sub>OC</sub> | log <i>K</i> <sub>OA</sub> | Half-life time (h)<br>(Level III Fugacity Model;<br>Air/Water/Soil/Sediment) | BCF<br>(L kg <sup>-1</sup> ) |
|-------------------------|--------------|-----------|-----------------------------------------------|--------|-------------------------------------------------------------------------------------|----------------------------------------------|--------------------------------------|---------------------------------------------------------------|----------------------------|----------------------------|----------------------------|------------------------------------------------------------------------------|------------------------------|
| Benzo[g,i,h]perylene    | BghiP        | 191-24-2  | C <sub>22</sub> H <sub>12</sub>               | 276.33 | 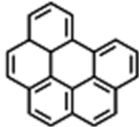   | 3.00E-3                                      | 1.00E-10                             | 3.31E-7                                                       | 6.63                       | 5.75                       | 11.5                       | 2.95/1.44E3/2.88E3/1.3E4                                                     | 1.10E4                       |
| O-PAH                   |              |           |                                               |        |                                                                                     |                                              |                                      |                                                               |                            |                            |                            |                                                                              |                              |
| Naphthalene-1-aldehyde  | NAP-1-ALD    | 66-77-3   | C <sub>11</sub> H <sub>8</sub> O              | 156.18 |    | 244.20                                       | 2.50E-3                              | 1.94E-6                                                       | 2.89                       | 2.29                       | 7.16                       | 9.22/360/720/3.24E3                                                          | 37                           |
| 9-Fluorenone            | 9-FLO        | 486-25-9  | C <sub>13</sub> H <sub>8</sub> O              | 180.2  |    | 3.74                                         | 5.72E-5                              | 6.77E-7                                                       | 3.58                       | 3.10                       | 8.14                       | 41.6/360/720/3.24E3                                                          | 28                           |
| Anthraquinone           | ATQ          | 84-65-1   | C <sub>14</sub> H <sub>8</sub> O <sub>2</sub> | 208.21 |    | 3.92                                         | 1.16E-7                              | 3.18E-9                                                       | 3.39                       | 3.70                       | 9.41                       | 171/720/1.8E3/8.1E3                                                          | 21                           |
| Phenanthrene-9-aldehyde | PHE-9-ALD    | 4707-71-5 | C <sub>15</sub> H <sub>10</sub> O             | 206.24 |   | 1.07                                         | 5.74E-6                              | 1.34E-7                                                       | 4.06                       | 2.94                       | 9.34                       | 10.9/360/720/3.24E3                                                          | 1019                         |
| Benzanthrone            | BZO          | 82-05-3   | C <sub>17</sub> H <sub>10</sub> O             | 230.26 |  | 0.18                                         | 2.21E-7                              | 6.61E-8                                                       | 4.81                       | 3.78                       | 10.38                      | 14.3/900/1.8E3/8.1E3                                                         | 180                          |
| N-PAH                   |              |           |                                               |        |                                                                                     |                                              |                                      |                                                               |                            |                            |                            |                                                                              |                              |



| Chemicals           | Abbreviation | CAS#      | Formula                                        | M.W.   | Structure                                                                            | Solubility<br>(mg L <sup>-1</sup> )<br>25 °C | Vapor<br>pressure<br>(mmHg)<br>25 °C | Henry's law<br>constant<br>(atm/m <sup>3</sup> /mol)<br>25 °C | log <i>K</i> <sub>OW</sub> | log <i>K</i> <sub>OC</sub> | log <i>K</i> <sub>OA</sub> | Half-life time (h)<br>(Level III Fugacity Model;<br>Air/Water/Soil/Sediment) | BCF<br>(L kg <sup>-1</sup> ) |
|---------------------|--------------|-----------|------------------------------------------------|--------|--------------------------------------------------------------------------------------|----------------------------------------------|--------------------------------------|---------------------------------------------------------------|----------------------------|----------------------------|----------------------------|------------------------------------------------------------------------------|------------------------------|
| 1-Nitronaphthalene  | 1N-NAP       | 86-57-7   | C <sub>10</sub> H <sub>7</sub> NO <sub>2</sub> | 173.17 | 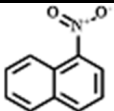    | 45.66                                        | 4.80E-4                              | 1.76E-6                                                       | 3.19                       | 2.91                       | 7.33                       | 47.5/900/1.8E3/8.1E3                                                         | 59                           |
| 2-Nitronaphthalene  | 2N-NAP       | 581-89-5  | C <sub>10</sub> H <sub>7</sub> NO <sub>2</sub> | 173.17 |     | 41.38                                        | 2.83E-4                              | 3.08E-6                                                       | 3.24                       | 2.94                       | 7.31                       | 45.8/900/1.8E3/8.1E3                                                         | 64                           |
| 5-Nitroacenaphthene | 5N-ACE       | 602-87-9  | C <sub>12</sub> H <sub>9</sub> NO <sub>2</sub> | 199.20 |     | 0.72                                         | 3.85E-5                              | 4.88E-7                                                       | 3.85                       | 3.27                       | 8.19                       | 30.9/900/1.8E3/8.1E3                                                         | 161                          |
| 2-Nitrofluorene     | 2N-FLU       | 607-57-8  | C <sub>13</sub> H <sub>9</sub> NO <sub>2</sub> | 211.22 |    | 1.60                                         | 4.43E-6                              | 2.87E-7                                                       | 3.37                       | 3.01                       | 7.94                       | 61.7/900/1.8E3/8.1E3                                                         | 78                           |
| 9-Nitroanthracene   | 9N-ANT       | 602-60-8  | C <sub>14</sub> H <sub>9</sub> NO <sub>2</sub> | 223.23 |     | 0.09                                         | 1.2E-6                               | 2.13E-7                                                       | 4.78                       | 3.79                       | 9.86                       | 51.4/900/1.8E3/8.1E3                                                         | 662                          |
| 3-Nitrofluoranthene | 3N-FLT       | 892-21-7  | C <sub>16</sub> H <sub>9</sub> NO <sub>2</sub> | 247.25 |  | 0.07                                         | 5.52E-8                              | 2.45E-8                                                       | 4.75                       | 3.77                       | 10.62                      | 52/4.32E3/8.64E3/3.89E4                                                      | 633                          |
| 1-Nitropyrene       | 1N-PYR       | 5522-43-0 | C <sub>16</sub> H <sub>9</sub> NO <sub>2</sub> | 247.25 |   | 0.04                                         | 8.29E-8                              | 2.45E-8                                                       | 5.06                       | 3.94                       | 10.93                      | 41.1/4.32E3/8.64E3/3.89E4                                                    | 1013                         |

| Chemicals                | Abbreviation | CAS#       | Formula                                         | M.W.   | Structure                                                                           | Solubility<br>(mg L <sup>-1</sup> )<br>25 °C | Vapor<br>pressure<br>(mmHg)<br>25 °C | Henry's law<br>constant<br>(atm/m <sup>3</sup> /mol)<br>25 °C | log <i>K</i> <sub>OW</sub> | log <i>K</i> <sub>OC</sub> | log <i>K</i> <sub>OA</sub> | Half-life time (h)<br>(Level III Fugacity Model;<br>Air/Water/Soil/Sediment) | BCF<br>(L kg <sup>-1</sup> ) |
|--------------------------|--------------|------------|-------------------------------------------------|--------|-------------------------------------------------------------------------------------|----------------------------------------------|--------------------------------------|---------------------------------------------------------------|----------------------------|----------------------------|----------------------------|------------------------------------------------------------------------------|------------------------------|
| 7-Nitrobenz[a]anthracene | 7N-BaA       | 20268-51-3 | C <sub>18</sub> H <sub>11</sub> NO <sub>2</sub> | 273.30 | 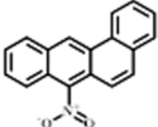   | 0.02                                         | 7.61E-9                              | 1.47E-8                                                       | 5.34                       | 4.10                       | 11.43                      | 41.1/4.32E3/8.64E3/3.89E4                                                    | 1547                         |
| 6-Nitrochrysene          | 6N-CHR       | 7496-02-8  | C <sub>18</sub> H <sub>11</sub> NO <sub>2</sub> | 273.30 |    | 0.02                                         | 3.52E-9                              | 1.47E-8                                                       | 5.34                       | 4.10                       | 11.43                      | 41.1/4.32E3/8.64E3/3.89E4                                                    | 1547                         |
| <b>Br-PAH</b>            |              |            |                                                 |        |                                                                                     |                                              |                                      |                                                               |                            |                            |                            |                                                                              |                              |
| 5-Bromoacenaphthene      | 5-BrACE      | 2051-98-1  | C <sub>12</sub> H <sub>9</sub> Br               | 233.10 |    | 0.11                                         | 5.00E-9                              | 1.13E-4                                                       | 5.04                       | 4.37                       | 7.38                       | 8.78/900/1.8E3/8.1E3                                                         | 984                          |
| 1-Bromoanthracene        | 1-BrANT      | 7397-92-4  | C <sub>14</sub> H <sub>9</sub> Br               | 257.13 |    | 0.06                                         | 1.06E-5                              | 2.05E-5                                                       | 5.24                       | 4.55                       | 8.32                       | 10.2/900/1.8E3/8.1E3                                                         | 1321                         |
| 9-Bromophenanthrene      | 9-BrPHE      | 573-17-1   | C <sub>14</sub> H <sub>9</sub> Br               | 257.13 |  | 0.06                                         | 3.44E-5                              | 2.05E-5                                                       | 5.24                       | 4.55                       | 8.32                       | 31.4/900/1.8E3/8.1E3                                                         | 6053                         |
| 3-Bromophenanthrene      | 3-BrPHE      | 715-50-4   | C <sub>14</sub> H <sub>9</sub> Br               | 257.13 |  | 0.06                                         | 1.06E-5                              | 2.05E-5                                                       | 5.24                       | 4.55                       | 8.32                       | 31.4/900/1.8E3/8.1E3                                                         | 6053                         |

| Chemicals             | Abbreviation            | CAS#        | Formula                                        | M.W.   | Structure                                                                           | Solubility<br>(mg L <sup>-1</sup> )<br>25 °C | Vapor<br>pressure<br>(mmHg)<br>25 °C | Henry's law<br>constant<br>(atm/m <sup>3</sup> /mol)<br>25 °C | log <i>K</i> <sub>OW</sub> | log <i>K</i> <sub>OC</sub> | log <i>K</i> <sub>OA</sub> | Half-life time (h)<br>(Level III Fugacity Model;<br>Air/Water/Soil/Sediment) | BCF<br>(L kg <sup>-1</sup> ) |
|-----------------------|-------------------------|-------------|------------------------------------------------|--------|-------------------------------------------------------------------------------------|----------------------------------------------|--------------------------------------|---------------------------------------------------------------|----------------------------|----------------------------|----------------------------|------------------------------------------------------------------------------|------------------------------|
| 2-Bromophenanthrene   | 2-BrPHE                 | 62162-97-4  | C <sub>14</sub> H <sub>9</sub> Br              | 257.13 | 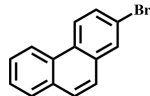   | 0.06                                         | 1.06E-5                              | 2.05E-5                                                       | 5.24                       | 4.55                       | 8.32                       | 31.4/900/1.8E3/8.1E3                                                         | 6053                         |
| 2,7-Dibromofluorene   | 2,7-Br <sub>2</sub> FLU | 16433-88-8  | C <sub>13</sub> H <sub>8</sub> Br <sub>2</sub> | 324.01 |   | 8.00E-03                                     | 7.04E-6                              | 2.66E-5                                                       | 5.80                       | 5.03                       | 8.76                       | 57.8/1.44E3/2.88E3/1.3E4                                                     | 3096                         |
| 3-Bromofluoranthene   | 3-BrFLT                 | 13438-50-1  | C <sub>16</sub> H <sub>9</sub> Br              | 281.15 |    | 0.01                                         | 4.13E-7                              | 3.31E-6                                                       | 5.82                       | 5.05                       | 9.69                       | 22.7/4.32E3/6.64E3/3.89E4                                                    | 3229                         |
| 1,8-Dibromoanthracene | 1,8-Br <sub>2</sub> ANT | 131276-24-9 | C <sub>14</sub> H <sub>8</sub> Br <sub>2</sub> | 336.02 |    | 3.00E-3                                      | 9.89E-7                              | 8.15E-6                                                       | 6.13                       | 5.32                       | 9.61                       | 35.6/1.44E3/2.88E3/1.3E4                                                     | 1.97E4                       |
| 1-Bromopyrene         | 1-BrPYR                 | 1714-29-0   | C <sub>16</sub> H <sub>9</sub> Br              | 281.15 |    | 0.01                                         | 4.13E-7                              | 3.31E-6                                                       | 5.81                       | 5.04                       | 9.68                       | 8.16/4.32E3/8.64E3/3.89E4                                                    | 3165                         |
| 2-Bromotriphenylene   | 2-BrTriPH               | 19111-87-6  | C <sub>18</sub> H <sub>11</sub> Br             | 307.19 |  | 3.00E-3                                      | 5.84E-8                              | 2.00E-6                                                       | 6.41                       | 5.56                       | 10.5                       | 8.16/4.32E3/8.64E3/3.89E4                                                    | 7888                         |
| 1,6-Dibromopyrene     | 1,6-Br <sub>2</sub> PYR | 27973-29-1  | C <sub>16</sub> H <sub>8</sub> Br <sub>2</sub> | 360.04 |  | 7.00E-4                                      | 3.95E-8                              | 1.32E-6                                                       | 6.69                       | 5.84                       | 11.0                       | 28.5/4.32E3/8.64E3/3.89E4                                                    | 4.94E4                       |

| Chemicals                      | Abbreviation             | CAS#       | Formula                                        | M.W.   | Structure                                                                           | Solubility<br>(mg L <sup>-1</sup> )<br>25 °C | Vapor<br>pressure<br>(mmHg)<br>25 °C | Henry's law<br>constant<br>(atm/m <sup>3</sup> /mol)<br>25 °C | log <i>K</i> <sub>OW</sub> | log <i>K</i> <sub>OC</sub> | log <i>K</i> <sub>OA</sub> | Half-life time (h)<br>(Level III Fugacity Model;<br>Air/Water/Soil/Sediment) | BCF<br>(L kg <sup>-1</sup> ) |
|--------------------------------|--------------------------|------------|------------------------------------------------|--------|-------------------------------------------------------------------------------------|----------------------------------------------|--------------------------------------|---------------------------------------------------------------|----------------------------|----------------------------|----------------------------|------------------------------------------------------------------------------|------------------------------|
| 7-Bromo<br>Benz[a]anthracene   | 7-BrBaA                  | 32795-84-9 | C <sub>18</sub> H <sub>11</sub> Br             | 307.19 | 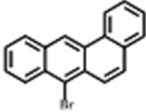   | 0.003                                        | 5.84E-8                              | 2.00E-6                                                       | 6.41                       | 5.56                       | 10.5                       | 8.16/4.32E3/8.64E3/3.89E4                                                    | 7888                         |
| 6-<br>Bromobenzo[a]pyrene      | 6-BrBaP                  | 21248-00-0 | C <sub>20</sub> H <sub>11</sub> Br             | 331.21 |    | 7.00E-4                                      | 2.18E-9                              | 3.23E-7                                                       | 7.00                       | 6.08                       | 11.9                       | 8.16/4.32E3/8.64E3/3.89E4                                                    | 1.93E4                       |
| <b>Cl-PAH</b>                  |                          |            |                                                |        |                                                                                     |                                              |                                      |                                                               |                            |                            |                            |                                                                              |                              |
| 9-Chloroanthracene             | 9-ClANT                  | 716-53-0   | C <sub>14</sub> H <sub>9</sub> Cl              | 212.67 |    | 0.09                                         | 2.56E-5                              | 3.80E-5                                                       | 5.27                       | 4.57                       | 8.08                       | 9.12/900/1.8E3/8.1E3                                                         | 1394                         |
| 9-Chlorophenanthrene           | 9-ClPHE                  | 947-72-8   | C <sub>14</sub> H <sub>9</sub> Cl              | 212.67 |    | 0.16                                         | 2.56E-5                              | 3.80E-5                                                       | 4.99                       | 4.33                       | 7.80                       | 28.1/900/1.8E3/8.1E3                                                         | 4168                         |
| 2,7-Dichlorofluorene           | 2,7-Cl <sub>2</sub> FLU  | 7012-16-0  | C <sub>13</sub> H <sub>8</sub> Cl <sub>2</sub> | 235.11 |   | 0.07                                         | 2.55E-5                              | 9.19E-5                                                       | 5.30                       | 4.60                       | 7.73                       | 52.5/1.44E3/2.88E3/1.3E4                                                     | 1469                         |
| 9,10-Dichloro-<br>phenanthrene | 9,10-Cl <sub>2</sub> PHE | 17219-94-2 | C <sub>14</sub> H <sub>8</sub> Cl <sub>2</sub> | 247.12 |  | 0.03                                         | 6.20E-6                              | 2.82E-5                                                       | 5.63                       | 4.89                       | 8.57                       | 96.1/1.44E3/2.88E3/1.3E4                                                     | 4.28E4                       |
| 9,10-Dichloro-<br>anthracene   | 9,10-Cl <sub>2</sub> ANT | 605-48-1   | C <sub>14</sub> H <sub>8</sub> Cl <sub>2</sub> | 247.12 |  | 0.03                                         | 6.20E-6                              | 2.82E-5                                                       | 5.63                       | 4.89                       | 8.57                       | 31.2/1.44E3/2.88E3/1.3E4                                                     | 9339                         |

| Chemicals                       | Abbreviation                 | CAS#       | Formula                                        | M.W.   | Structure                                                                         | Solubility<br>(mg L <sup>-1</sup> )<br>25 °C | Vapor<br>pressure<br>(mmHg)<br>25 °C | Henry's law<br>constant<br>(atm/m <sup>3</sup> /mol)<br>25 °C | log <i>K</i> <sub>OW</sub> | log <i>K</i> <sub>OC</sub> | log <i>K</i> <sub>OA</sub> | Half-life time (h)<br>(Level III Fugacity Model;<br>Air/Water/Soil/Sediment) | BCF<br>(L kg <sup>-1</sup> ) |
|---------------------------------|------------------------------|------------|------------------------------------------------|--------|-----------------------------------------------------------------------------------|----------------------------------------------|--------------------------------------|---------------------------------------------------------------|----------------------------|----------------------------|----------------------------|------------------------------------------------------------------------------|------------------------------|
| 1-Chloropyrene                  | 1-ClPYR                      | 34244-14-9 | C <sub>16</sub> H <sub>9</sub> Cl              | 236.69 | 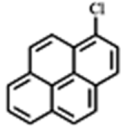 | 0.04                                         | 1.12E-6                              | 6.15E-6                                                       | 5.58                       | 4.84                       | 9.18                       | 7.3/4.32E3/8.64E3/3.89E4                                                     | 2223                         |
| 1,5,9,10-Tetrachloro-anthracene | 1,5,9,10-Cl <sub>4</sub> ANT | 82843-47-8 | C <sub>14</sub> H <sub>6</sub> Cl <sub>4</sub> | 316.01 |  | 9.00E-4                                      | 3.43E-7                              | 1.55E-5                                                       | 6.92                       | 4.90                       | 10.1                       | 152/4.32E3/8.64E3/3.89E4                                                     | 6.62E4                       |

Abbreviations: M.W.= Molecular Weight; CAS#= Chemical Abstracts Service; *K*<sub>OW</sub>=Octanol-Water Partition Coefficient; *K*<sub>OC</sub>=Soil Adsorption Coefficient;

*K*<sub>OA</sub>=Octanol-Air Partition Coefficient; BCF=Bioconcentration Factor;

The physicochemical properties of the pollutants were predicted using the USEPA EPI Suite software (EPIWEB 4.1)

Table S2. Basic information on internal standards used in the study.

| NO. | Abbreviation | Chemicals                   | CAS#        |
|-----|--------------|-----------------------------|-------------|
| 1   | NAP-d8       | Naphthalene-d8              | 1146-65-2   |
| 2   | ACY-d8       | Acenaphthylene-d8           | 93951-97-4  |
| 3   | ACE-d10      | Acenaphthene-d10            | 15067-26-2  |
| 4   | FLO-d10      | Fluorene-d10                | 81103-79-9  |
| 5   | PHE-d10      | Phenanthrene-d10            | 1517-22-2   |
| 6   | ANT-d10      | Anthracene-d10              | 1719-06-8   |
| 7   | FLT-d10      | Fluoranthene-d10            | 93951-69-0  |
| 8   | PYR-d10      | Pyrene-d10                  | 1718-52-1   |
| 9   | BaA-d12      | Benzo[a]anthracene-d12      | 1718-53-2   |
| 10  | CHR-d12      | Chrysene-d12                | 1719-03-5   |
| 11  | BbF -d12     | Benzo[b]fluoranthene-d12    | 93951-98-5  |
| 12  | BkF-d12      | Benzo[k]fluoranthene-d12    | 93952-01-3  |
| 13  | BaP-d12      | Benzo[a]pyrene-d12          | 93951-66-7  |
| 14  | IcdP-d12     | Ideno-[1,2,3-c,d]pyrene-d12 | 203578-33-0 |
| 15  | DahA-d14     | Dibenzo[a,h]anthracene-d14  | 13250-98-1  |
| 16  | BghiP-d12    | Benzo[g,i,h]perylene-d12    | 93951-66-7  |
| 17  | 1N-NAP-d7    | 1-Nitropyrene-d7            | 80789-77-1  |
| 18  | 9-FLO-d8     | 9-Fluorenone-d8             | 137219-34-2 |
| 19  | ATQ-d8       | Anthraquinone-d8            | 10439-39-1  |
| 20  | 9N-ANT-d9    | 9-Nitroanthracene-d9        | 220381-38-4 |
| 21  | 3N-FLT-d9    | 3-Nitrofluoranthene-d9      | 350820-11-0 |
| 22  | 1N-PYR-d9    | 1-Nitropyrene-d9            | 3487-20-8   |

Table S3. Sampling sites information

| Sampling location | Longitude  | Latitude  |
|-------------------|------------|-----------|
| D-1               | 121.620498 | 38.957681 |
| D-2               | 121.619314 | 38.956873 |
| D-3               | 121.618996 | 38.957911 |
| D-4               | 121.619596 | 38.958529 |
| D-5               | 121.606076 | 38.952593 |
| D-6               | 121.605515 | 38.953148 |
| D-7               | 121.609095 | 38.951996 |
| D-8               | 121.610179 | 38.952491 |
| D-9               | 121.609629 | 38.966964 |
| D-10              | 121.608333 | 38.965429 |

Table S4. Instrumental parameters of GC-HRMS

| GC conditions                  |                                                     |                     |                      |                    |
|--------------------------------|-----------------------------------------------------|---------------------|----------------------|--------------------|
| GC system                      | Trace 1610 GC                                       |                     |                      |                    |
| Sample wash volume             | 2.0 µL                                              |                     |                      |                    |
| Sample injection volume        | 2.0 µL                                              |                     |                      |                    |
| Inlet parameters               | Splitless                                           |                     |                      |                    |
| Column                         | TG- 5 MS column (30 m×0.25 mm,0.25 um)              |                     |                      |                    |
| Aux Heaters (1 and 2)          | 280°C                                               |                     |                      |                    |
| GC oven settings               |                                                     |                     |                      |                    |
| NO.                            | Retention time<br>(min)                             | Rate<br>(°C/min)    | Target value<br>(°C) | Hold time<br>(min) |
| 1                              | 0.00                                                |                     | Run                  |                    |
| 2                              | 1.50                                                | 0.00                | 40.0                 | 1.50               |
| 3                              | 5.00                                                | 25.00               | 90.0                 | 1.50               |
| 4                              | 10.1                                                | 25.00               | 180                  | 1.50               |
| 5                              | 31.6                                                | 5.00                | 280                  | 1.50               |
| 6                              | 44.6                                                | 10.00               | 310                  | 10.0               |
| 8                              |                                                     | Stop run            |                      |                    |
| MS conditions                  |                                                     |                     |                      |                    |
| MS system                      | Orbitrap Exploris 120 MS (Thermo Fisher Scientific) |                     |                      |                    |
|                                | Ion source type                                     | EI                  |                      |                    |
|                                | Ion source temperature                              | 250 °C              |                      |                    |
| Global parameters              | Electron energy                                     | 70 eV               |                      |                    |
|                                | Emission lens                                       | 15 V                |                      |                    |
|                                | Emission current                                    | 50 µA               |                      |                    |
|                                | Orbitrap resolution                                 | 3.0×10 <sup>4</sup> |                      |                    |
|                                | Scan range (m/z)                                    | 50-750              |                      |                    |
| Scan parameters<br>(Full-scan) | AGC Target                                          | Standard            |                      |                    |
|                                | Maximum Injection Time Mode                         | Auto                |                      |                    |
|                                | Microscans                                          | 1                   |                      |                    |
|                                | C-Trap Offset                                       | Static              |                      |                    |

Table S5. Procedure blanks, matrix spiked recoveries, and method detection limits (MDLs) of target PAHs and derivatives

| Target chemicals             | Analyte m/z | Retention time (min) | Internal standard | Average procedure blank (n=8) (ng g <sup>-1</sup> ) | Recovery (20 ng, n=8) <sup>a</sup> |       | MDLs (ng/g) <sup>b</sup> |
|------------------------------|-------------|----------------------|-------------------|-----------------------------------------------------|------------------------------------|-------|--------------------------|
|                              |             |                      |                   |                                                     | Average (%)                        | RSD   |                          |
| NAP                          | 128.06205   | 7.92                 | NAP-d8            | 5.61                                                | 91.3                               | 0.003 | 2.29                     |
| ACY                          | 152.06205   | 9.91                 | ACY -d8           | n.d.                                                | 95.6                               | 0.76  | 0.015                    |
| ACE                          | 154.07770   | 10.21                | ACE-d10           | 0.31                                                | 95.1                               | 0.84  | 0.16                     |
| FLO                          | 166.07770   | 11.16                | FLO-d10           | n.d.                                                | 96.3                               | 2.26  | 0.018                    |
| PHE                          | 178.07770   | 13.54                | PHE-d10           | n.d.                                                | 94.0                               | 1.32  | 0.48                     |
| ANT                          | 178.07770   | 13.67                | ANT-d10           | n.d.                                                | 95.5                               | 0.66  | 0.49                     |
| FLT                          | 202.07770   | 17.63                | FLT-d10           | n.d.                                                | 96.2                               | 1.05  | 0.51                     |
| PYR                          | 202.07770   | 18.47                | PYR-d10           | n.d.                                                | 95.3                               | 2.66  | 0.53                     |
| BaA                          | 228.09335   | 23.62                | BaA -d12          | 4.72                                                | 92.0                               | 0.64  | 0.053                    |
| CHR                          | 228.09335   | 23.79                | CHR-d12           | n.d.                                                | 90.5                               | 2.00  | 0.056                    |
| BbF                          | 252.09335   | 28.20                | BbF -d12          | n.d.                                                | 96.6                               | 0.14  | 0.14                     |
| BkF                          | 252.09335   | 28.30                | BkF-d12           | n.d.                                                | 97.0                               | 1.10  | 0.13                     |
| BaP                          | 252.09335   | 29.43                | BaP-d12           | 5.15                                                | 87.3                               | 0.88  | 0.053                    |
| IcdP                         | 276.09335   | 33.71                | IcdP-d12          | n.d.                                                | 92.2                               | 4.88  | 0.57                     |
| DahA                         | 278.10900   | 33.84                | DahA-d14          | n.d.                                                | 97.2                               | 1.37  | 0.50                     |
| BghiP                        | 276.09335   | 34.43                | BghiP-d12         | n.d.                                                | 98.6                               | 2.37  | 0.52                     |
| NAP-1-ALD                    | 156.05696   | 10.38                | ACE-d10           | 0.84                                                | 95.0                               | 0.77  | 0.068                    |
| 9-FLO                        | 180.05696   | 12.96                | 9-FLO-d8          | n.d.                                                | 96.7                               | 1.18  | 0.068                    |
| ATQ                          | 208.05188   | 18.57                | ATQ-d8            | n.d.                                                | 72.3                               | 1.40  | 0.13                     |
| PHE-9-ALD                    | 206.07261   | 16.23                | PYR-d10           | 6.54                                                | 99.2                               | 1.32  | 0.10                     |
| BZO                          | 230.07261   | 24.32                | 3N-FLT-d9         | n.d.                                                | 93.7                               | 3.31  | 0.39                     |
| 1N-NAP                       | 173.04713   | 11.39                | 1N-NAP-d7         | 5.88                                                | 89.7                               | 0.92  | 0.093                    |
| 2N-NAP                       | 173.04713   | 11.84                | 1N-NAP-d7         | n.d.                                                | 91.1                               | 3.15  | 0.94                     |
| 5N-ACE                       | 199.06278   | 16.87                | ATQ-d8            | n.d.                                                | 76.2                               | 1.42  | 1.17                     |
| 2N-FLU                       | 211.06278   | 18.37                | PYR-d10           | 6.39                                                | 110                                | 0.86  | 1.53                     |
| 9N-ANT                       | 223.06278   | 21.40                | 9N-ANT-d9         | n.d.                                                | 114                                | 0.41  | 3.49                     |
| 3N-FLT                       | 247.06278   | 25.14                | 3N-FLT-d9         | n.d.                                                | 115                                | 1.92  | 2.93                     |
| 1N-PYR                       | 247.06278   | 25.96                | 1N-PYR-d9         | 2.48                                                | 82.4                               | 0.74  | 0.63                     |
| 7N-BaA                       | 273.07843   | 28.80                | BbF -d12          | 8.09                                                | 97.5                               | 1.33  | 1.04                     |
| 6N-CHR                       | 273.07843   | 30.02                | BaP-d12           | 7.59                                                | 102                                | 3.96  | 0.37                     |
| 5-BrACE                      | 231.98821   | 13.98                | PHE-d10           | 1.46                                                | 94.5                               | 1.73  | 0.045                    |
| 1-BrANT                      | 255.98821   | 18.08                | PYR-d10           | n.d.                                                | 95.6                               | 2.12  | 0.19                     |
| 9-BrPHE                      | 255.98821   | 18.28                | PYR-d10           | n.d.                                                | 96.9                               | 0.73  | 0.083                    |
| 3-BrPHE                      | 255.98821   | 18.28                | PYR-d10           | n.d.                                                | 97.0                               | 2.30  | 0.20                     |
| 2-BrPHE                      | 255.98821   | 18.39                | PYR-d10           | n.d.                                                | 96.9                               | 2.41  | 0.16                     |
| 2,7-Br <sub>2</sub> FLU      | 321.89872   | 20.61                | 9N-ANT-d9         | n.d.                                                | 87.0                               | 0.60  | 0.57                     |
| 3-BrFLT                      | 279.98821   | 22.80                | BaA -d12          | 0.95                                                | 93.8                               | 1.50  | 0.068                    |
| 1,8-Br <sub>2</sub> ANT      | 333.89872   | 23.31                | BaA -d12          | 2.84                                                | 96.7                               | 1.09  | 0.004                    |
| 1-BrPYR                      | 279.98821   | 23.76                | CHR-d12           | n.d.                                                | 101                                | 3.67  | 0.43                     |
| 2-BrTriPH                    | 306.00386   | 28.58                | BbF -d12          | n.d.                                                | 94.0                               | 1.07  | 0.56                     |
| 1,6-Br <sub>2</sub> PYR      | 357.89872   | 28.82                | BkF-d12           | n.d.                                                | 89.7                               | 1.35  | 1.12                     |
| 7-BrBaA                      | 306.00386   | 28.86                | BkF-d12           | 1.19                                                | 86.7                               | 1.17  | 0.002                    |
| 6-BrBaP                      | 330.00386   | 34.53                | BghiP-d12         | 4.63                                                | 93.6                               | 1.56  | 0.038                    |
| 9-CIANT                      | 212.03872   | 16.54                | ATQ-d8            | n.d.                                                | 72.0                               | 0.51  | 0.059                    |
| 9-CIPHE                      | 212.03872   | 16.80                | ATQ-d8            | n.d.                                                | 84.7                               | 0.23  | 0.057                    |
| 2,7-Cl <sub>2</sub> FLU      | 233.99975   | 17.04                | FLT-d10           | n.d.                                                | 98.0                               | 2.82  | 0.22                     |
| 9,10-Cl <sub>2</sub> PHE     | 245.99975   | 19.85                | 9N-ANT-d9         | n.d.                                                | 84.6                               | 0.020 | 0.053                    |
| 9,10-Cl <sub>2</sub> ANT     | 245.99975   | 20.07                | 9N-ANT-d9         | n.d.                                                | 81.7                               | 3.23  | 0.063                    |
| 1-CIPYR                      | 236.03872   | 21.90                | BaA -d12          | n.d.                                                | 97.0                               | 1.80  | 0.074                    |
| 1,5,9,10-Cl <sub>4</sub> ANT | 313.92181   | 27.69                | BbF -d12          | n.d.                                                | 94.0                               | 0.71  | 0.46                     |



a: Matrix spiked recoveries were calculated by the analyte concentration ratio of pre-spiked to post-spiked samples (both after subtracted matrix blank)

b: For the chemicals without procedure blank, MDLs were calculated based on instrumental LOQ and samples volume, while for the chemicals with procedure blank, MDLs were calculated based on 3 times of procedure blank's standard deviation and samples volume. RSD: relative standard deviation.

n.d. stands for not detected.

Table S6. Detail parameters of *GC EI with Statistics*.

| Main parameter settings  |                                       |                                                                     |
|--------------------------|---------------------------------------|---------------------------------------------------------------------|
| Peak detection settings  | Mass tolerance                        | 5 ppm                                                               |
|                          | Spectral peak S/N threshold           | 3                                                                   |
|                          | Peak S/N threshold                    | 3                                                                   |
|                          | Smoothing                             | 9                                                                   |
|                          | TIC threshold                         | 10 <sup>6</sup>                                                     |
|                          | Ion overlap window                    | 95%                                                                 |
|                          | Include reference and exception peaks | Ture                                                                |
| Group compounds settings | RT tolerance                          | 5 sec                                                               |
|                          | Dot product threshold                 | 500                                                                 |
|                          | Composition threshold                 | 10%                                                                 |
| Library search settings  | Search libraries                      | mainlib                                                             |
|                          |                                       | replib                                                              |
|                          |                                       | gc-orbitrap contaminants library<br>gc-orbitrap other environmental |
|                          | SI/RSI threshold                      | 600                                                                 |

Table S7. Evaluation of Matrix Effects (ME) in Non-Targeted Screening.

| Abbreviation | Formula  | M.W.      | RT<br>(min) | Peak areas<br>(internal standard) | Peak areas<br>(sample) | ME<br>(%) |
|--------------|----------|-----------|-------------|-----------------------------------|------------------------|-----------|
| NAP-d8       | C10D8    | 136.11226 | 7.9         | 2.68E+06                          | 3.13E+06               | 117       |
| ACY-d8       | C12D8    | 160.11226 | 9.89        | 8.01E+06                          | 6.68E+06               | 83.3      |
| ACE-d10      | C12D10   | 164.14046 | 10.15       | 2.73E+06                          | 3.04E+06               | 111       |
| FLO-d10      | C13D10   | 176.14046 | 11.1        | 6.97E+06                          | 5.53E+06               | 79.4      |
| PHE-d10      | C14D10   | 188.14046 | 13.62       | 1.02E+07                          | 1.08E+07               | 106       |
| ANT-d10      | C14D10   | 188.14046 | 13.62       | 1.32E+07                          | 1.19E+07               | 89.9      |
| FLT-d10      | C16D10   | 212.14046 | 17.56       | 1.68E+07                          | 1.60E+07               | 95.2      |
| PYR-d10      | C16D10   | 212.14046 | 18.39       | 1.95E+07                          | 1.66E+07               | 85.2      |
| BaA-d12      | C18D12   | 240.16867 | 23.53       | 1.14E+07                          | 9.25E+06               | 81.5      |
| CHR-d12      | C18D12   | 240.16867 | 23.68       | 1.96E+07                          | 2.29E+07               | 117       |
| BbF -d12     | C20D12   | 264.16867 | 28.13       | 4.86E+06                          | 4.12E+06               | 84.7      |
| BkF-d12      | C20D12   | 264.16867 | 28.23       | 6.31E+06                          | 5.43E+06               | 86.0      |
| BaP-d12      | C20D12   | 264.16867 | 29.36       | 3.86E+06                          | 3.37E+06               | 87.4      |
| IcdP-d12     | C22D12   | 288.16867 | 33.65       | 1.42E+06                          | 1.24E+06               | 87.1      |
| DahA-d14     | C22D14   | 292.19687 | 33.76       | 1.29E+06                          | 1.17E+06               | 90.8      |
| BghiP-d12    | C22D12   | 288.16867 | 34.37       | 1.32E+06                          | 9.89E+05               | 74.8      |
| 1N-NAP-d7    | C10D7NO2 | 180.09106 | 11.36       | 4.82E+05                          | 4.89E+05               | 101       |
| 9-FLO-d8     | C13D8O   | 188.10718 | 12.92       | 8.28E+06                          | 6.58E+06               | 79.4      |
| ATQ-d8       | C14D8O2  | 216.10209 | 16.16       | 1.38E+06                          | 1.38E+06               | 100       |
| 9N-ANT-d9    | C14D9NO2 | 232.11927 | 18.81       | 4.59E+05                          | 5.41E+05               | 118       |
| 3N-FLT-d9    | C16D9NO2 | 232.11927 | 18.81       | 4.79E+05                          | 5.41E+05               | 113       |
| 1N-PYR-d9    | C16D9NO2 | 256.11927 | 25.93       | 9.10E+03                          | 1.08E+04               | 119       |

Matrix effects were assessed by comparing the peak areas of internal standards in sample matrices to those in solvent standards.

Table S8. Literature reference values for TEFs used in TEQs calculation.

| Target chemicals         | TEFs    | References |
|--------------------------|---------|------------|
| NAP                      | 0.001   |            |
| ACY                      | 0.001   |            |
| ACE                      | 0.001   |            |
| FLO                      | 0.001   |            |
| PHE                      | 0.001   |            |
| ANT                      | 0.01    |            |
| FLT                      | 0.001   | [1]        |
| PYR                      | 0.001   |            |
| BaA                      | 0.1     |            |
| CHR                      | 0.01    |            |
| BbF                      | 0.1     |            |
| BkF                      | 0.1     |            |
| BaP                      | 1.0     |            |
| IcdP                     | 0.1     |            |
| DahA                     | 5.0     | [2]        |
| BghiP                    | 0.01    | [1]        |
| 9-FLO                    | 0.002*  | [3]        |
| BZO                      | 0.0039* | [3]        |
| 5N-ACE                   | 0.01    |            |
| 2N-FLU                   | 0.01    |            |
| 9N-ANT                   | 0.0032  | [4]        |
| 3N-FLT                   | 0.0026  |            |
| 1N-PYR                   | 0.1     |            |
| 6N-CHR                   | 10      | [4]        |
| 9-BrPHE                  | 0.02*   | [3]        |
| 1-BrPYR                  | 0.04*   | [3]        |
| 7-BrBaA                  | 0.84*   | [3]        |
| 9-ClPHE                  | 0.03*   | [3]        |
| 9,10-Cl <sub>2</sub> ANT | 0.2*    | [3]        |

TEFs: toxic equivalency factor; \*: relative potencies to benzo[a]pyrene (BaP); TEQs: toxic equivalence quantities.

Table S9. Parameters and references required for calculation of incremental lifetime cancer risk (ILCR).

| Parameters                       | Abbreviation             | Unit                             | Adults<br>reference<br>value | Children<br>reference<br>value | References |
|----------------------------------|--------------------------|----------------------------------|------------------------------|--------------------------------|------------|
| Body weight                      | BW                       | kg                               | 70                           | 15                             | [5]        |
| Average life                     | AT                       | day                              |                              | 23433                          | [6]        |
| Exposure frequency               | EF                       | day year <sup>-1</sup>           |                              | 180                            | [7]        |
| Exposure duration                | ED                       | year                             | 24                           | 6                              | [8]        |
| Ingestion rate                   | IR <sub>Ingestion</sub>  | mg day <sup>-1</sup>             | 100                          | 200                            | [8]        |
| Inhalation rate                  | IR <sub>Inhalation</sub> | m <sup>3</sup> day <sup>-1</sup> | 20                           | 10                             | [9,10]     |
| Skin surface area exposed        | SA                       | cm <sup>2</sup>                  | 5700                         | 2800                           | [8]        |
| Adherence factor of dust to skin | AF                       | mg cm <sup>-2</sup>              | 0.2                          | 0.07                           | [8]        |
| Dermal absorption factor         | ABS                      | unitless                         |                              | 0.13                           | [8]        |
| Particle emission factor         | PEF                      | m <sup>3</sup> kg <sup>-1</sup>  |                              | 1.36×10 <sup>9</sup>           | [11]       |

Table S10. Concentrations and detection frequency (DF) of target PAHs and their derivatives in dust samples.

|              | D-1   | D-2   | D-3   | D-4  | D-5   | D-6   | D-7   | D-8   | D-9  | D-10  | Min   | Max  | Median | DF (%) |
|--------------|-------|-------|-------|------|-------|-------|-------|-------|------|-------|-------|------|--------|--------|
| <b>PAH</b>   |       |       |       |      |       |       |       |       |      |       |       |      |        |        |
| NAP          | 251   | 182   | 6.60  | 261  | 15.7  | 82.4  | 131   | 248   | 34.6 | 149   | 6.60  | 261  | 140    | 100    |
| ACY          | n.d.  | n.d.  | 2.35  | n.d. | 0.688 | n.d.  | n.d.  | n.d.  | 12.1 | n.d.  | 0     | 12.1 | n.d.   | 30     |
| ACE          | 73.6  | 37.7  | 0.846 | 32.6 | 2.56  | 24.5  | 32.4  | 29.6  | 17.1 | 19.6  | 0.846 | 73.6 | 27.1   | 100    |
| FLO          | 19.1  | 37.8  | 39.8  | 18.1 | 19.0  | 7.64  | 18.4  | 30.5  | 29.5 | 10.0  | 7.64  | 39.8 | 19.0   | 100    |
| PHE          | 54.4  | 47.0  | 15.0  | 84.8 | 10.8  | 106   | 183   | 152   | 181  | 15.1  | 10.8  | 183  | 69.6   | 100    |
| ANT          | 12.9  | 11.4  | 1.46  | 15.4 | 1.01  | 18.7  | 27.9  | 22.9  | 29.5 | 7.58  | 1.01  | 29.5 | 14.2   | 100    |
| FLT          | 51.5  | n.d.  | 16.3  | 57.7 | n.d.  | 121   | n.d.  | 119   | 142  | 4.30  | 0     | 142  | 33.9   | 70     |
| PYR          | 44.8  | 5.71  | 14.5  | 62.6 | 6.09  | 124   | 124   | 129   | 223  | 10.9  | 5.71  | 223  | 53.7   | 100    |
| BaA          | 12.8  | 2.85  | 0.160 | 16.7 | n.d.  | 23.2  | 0.508 | 17.9  | 15.1 | 2.56  | 0     | 23.2 | 7.83   | 90     |
| CHR          | 44.3  | n.d.  | 10.2  | 38.0 | 3.12  | 58.4  | 69.7  | 48.1  | 160  | 3.82  | 0     | 160  | 41.2   | 90     |
| BbF          | 37.0  | n.d.  | 5.62  | n.d. | 3.38  | 57.3  | 68.7  | 59.9  | n.d. | 4.31  | 0     | 68.7 | 4.96   | 70     |
| BkF          | 17.5  | 8.41  | 8.48  | 12   | 3.87  | 26.3  | 29.5  | 18.5  | 14.5 | 9.15  | 3.87  | 29.5 | 13.1   | 100    |
| BaP          | 15.5  | 5.74  | 4.72  | 151  | 2.56  | 31.2  | 31.2  | 26.9  | 4.10 | 5.11  | 2.56  | 151  | 10.6   | 100    |
| IcdP         | 35.6  | 18.1  | n.d.  | 30.7 | 2.64  | 46.5  | 52.8  | 45.9  | 21.5 | 21.9  | 0     | 52.8 | 26.3   | 90     |
| DahA         | n.d.  | n.d.  | n.d.  | n.d. | n.d.  | n.d.  | n.d.  | n.d.  | n.d. | n.d.  | n.d.  | n.d. | n.d.   | 0      |
| BghiP        | 7.79  | 5.84  | n.d.  | 29.3 | 3.85  | 36.2  | 45.1  | 43.5  | 5.63 | 10.0  | 0     | 45.1 | 8.90   | 90     |
| ΣPPAHs       | 678   | 362   | 126   | 810  | 75.3  | 764   | 814   | 991   | 889  | 273   |       |      |        |        |
| <b>O-PAH</b> |       |       |       |      |       |       |       |       |      |       |       |      |        |        |
| NAP-1-ALD    | 1.59  | n.d.  | n.d.  | 1.77 | 1.83  | 1.91  | 10.7  | 0.115 | 6.00 | n.d.  | 0     | 10.7 | 1.68   | 70     |
| 9-FLO        | 29.5  | 19.7  | 2.74  | 30.2 | 1.71  | 33.2  | 68.1  | 66.3  | 28.3 | 11.1  | 1.71  | 68.1 | 28.9   | 100    |
| ATQ          | 35.7  | n.d.  | 18.1  | 21.8 | 1.99  | n.d.  | n.d.  | 51.1  | 95.6 | n.d.  | 0     | 95.6 | 10.0   | 60     |
| PHE-9-ALD    | 0.867 | 0.734 | n.d.  | 2.67 | n.d.  | 0.449 | 2.11  | 1.50  | 3.02 | 0.221 | 0     | 3.02 | 0.800  | 80     |
| BZO          | 4.60  | n.d.  | 46.2  | n.d. | 3.7   | 61.2  | 25.7  | 23.1  | n.d. | n.d.  | 0     | 61.2 | 4.2    | 60     |
| ΣO-PAHs      | 72.2  | 20.4  | 67.1  | 56.5 | 9.27  | 96.8  | 107   | 142   | 133  | 11.4  |       |      |        |        |
| <b>N-PAH</b> |       |       |       |      |       |       |       |       |      |       |       |      |        |        |
| 1N-NAP       | 8.28  | 28.4  | n.d.  | 3.7  | n.d.  | 15.1  | 16.7  | 9.0   | 11.8 | 1.6   | 0     | 28.4 | 8.7    | 80     |
| 2N-NAP       | 20.4  | 20.1  | 3.28  | 18.5 | n.d.  | 16.0  | 14.6  | 14.9  | 26.6 | 15.6  | 0     | 26.6 | 15.8   | 90     |

|                              | D-1   | D-2   | D-3   | D-4   | D-5   | D-6   | D-7  | D-8   | D-9   | D-10  | Min  | Max   | Median | DF (%) |
|------------------------------|-------|-------|-------|-------|-------|-------|------|-------|-------|-------|------|-------|--------|--------|
| 5N-ACE                       | 66.0  | 102   | n.d.  | 55.7  | 1.68  | n.d.  | 67.7 | 63.7  | 129   | n.d.  | 0    | 129   | 59.7   | 70     |
| 2N-FLU                       | 36    | 27.4  | n.d.  | 95.1  | n.d.  | 14.8  | 5.09 | 14.7  | 78.2  | 26.4  | 0    | 95.1  | 20.6   | 80     |
| 9N-ANT                       | n.d.  | n.d.  | n.d.  | n.d.  | n.d.  | n.d.  | n.d. | n.d.  | n.d.  | n.d.  | n.d. | n.d.  | n.d.   | 0      |
| 3N-FLT                       | 6.71  | 7.29  | n.d.  | n.d.  | n.d.  | 19.1  | 7.17 | 7.76  | 6.28  | 4.18  | 0    | 19.1  | 6.50   | 70     |
| 1N-PYR                       | 13.5  | 41.7  | 0.96  | 7.63  | n.d.  | 11.8  | 2.00 | 15.9  | 9.00  | 6.99  | 0    | 41.7  | 8.31   | 90     |
| 7N-BaA                       | n.d.  | n.d.  | n.d.  | n.d.  | n.d.  | n.d.  | n.d. | n.d.  | n.d.  | n.d.  | n.d. | n.d.  | n.d.   | 0      |
| 6N-CHR                       | n.d.  | n.d.  | n.d.  | 9.21  | n.d.  | n.d.  | 5.01 | n.d.  | 3.79  | 2.60  | 0    | 9.21  | 0      | 40     |
| ΣN-PAHs                      | 151   | 227   | 4.24  | 190   | 1.68  | 76.8  | 118  | 126   | 265   | 57.3  |      |       |        |        |
| <b>Br-PAH</b>                |       |       |       |       |       |       |      |       |       |       |      |       |        |        |
| 5-BrACE                      | 17.6  | 31.2  | n.d.  | 19.3  | n.d.  | 2.93  | 4.51 | 4.03  | 5.32  | 2.33  | 0    | 31.2  | 4.27   | 80     |
| 1-BrANT                      | n.d.  | n.d.  | n.d.  | n.d.  | n.d.  | n.d.  | n.d. | n.d.  | n.d.  | n.d.  | n.d. | n.d.  | n.d.   |        |
| 9-BrPHE                      | n.d.  | n.d.  | n.d.  | n.d.  | n.d.  | n.d.  | n.d. | n.d.  | n.d.  | n.d.  | n.d. | n.d.  | n.d.   |        |
| 3-BrPHE                      | n.d.  | n.d.  | n.d.  | n.d.  | n.d.  | n.d.  | n.d. | n.d.  | n.d.  | n.d.  | n.d. | n.d.  | n.d.   |        |
| 2-BrPHE                      | n.d.  | n.d.  | n.d.  | n.d.  | n.d.  | n.d.  | n.d. | n.d.  | n.d.  | n.d.  | n.d. | n.d.  | n.d.   |        |
| 2,7-Br <sub>2</sub> FLU      | n.d.  | n.d.  | n.d.  | n.d.  | n.d.  | n.d.  | n.d. | n.d.  | n.d.  | n.d.  | n.d. | n.d.  | n.d.   |        |
| 3-BrFLT                      | 11.1  | 5.97  | n.d.  | 4.93  | n.d.  | 12.4  | n.d. | 36.2  | 54.0  | 42.4  | 0    | 54.0  | 8.54   | 70     |
| 1,8-Br <sub>2</sub> ANT      | 0.501 | 0.135 | 0.391 | 0.298 | 0.094 | 0.206 | n.d. | 0.013 | n.d.  | 0.198 | 0    | 0.501 | 0.167  | 80     |
| 1-BrPYR                      | n.d.  | n.d.  | n.d.  | n.d.  | n.d.  | n.d.  | n.d. | n.d.  | n.d.  | n.d.  | n.d. | n.d.  | n.d.   |        |
| 2-BrTriPH                    | n.d.  | n.d.  | n.d.  | n.d.  | n.d.  | n.d.  | n.d. | n.d.  | n.d.  | n.d.  | n.d. | n.d.  | n.d.   |        |
| 1,6-Br <sub>2</sub> PYR      | 17.3  | 14.7  | n.d.  | 30    | n.d.  | 14.7  | 16.9 | 10.0  | 24.6  | 9.9   | 0    | 29.8  | 14.7   | 80     |
| 7-BrBaA                      | 0.732 | 1.06  | 16.3  | n.d.  | 11.3  | 19.0  | 20.4 | 13.5  | 4.38  | 1.65  | 0    | 20.4  | 7.82   | 90     |
| 6-BrBaP                      | 4.18  | 3.60  | 32.8  | 12.3  | 3.87  | 3.07  | 1.81 | 2.51  | 12.1  | n.d.  | 0    | 32.8  | 3.73   | 90     |
| ΣBr-PAHs                     | 51.4  | 56.7  | 49.5  | 66.7  | 15.2  | 52.4  | 43.7 | 66.3  | 100   | 56.5  |      |       |        |        |
| <b>Cl-PAH</b>                |       |       |       |       |       |       |      |       |       |       |      |       |        |        |
| 9-ClANT                      | n.d.  | n.d.  | 0.656 | n.d.  | n.d.  | n.d.  | n.d. | n.d.  | 5.523 | n.d.  | 0    | 5.52  | n.d.   | 20     |
| 9-ClPHE                      | n.d.  | n.d.  | n.d.  | n.d.  | n.d.  | n.d.  | n.d. | 8.03  | 9.261 | n.d.  | 0    | 9.26  | n.d.   | 20     |
| 2,7-Cl <sub>2</sub> FLU      | n.d.  | n.d.  | n.d.  | n.d.  | n.d.  | n.d.  | n.d. | n.d.  | n.d.  | n.d.  | 0    | 0     | n.d.   | 0      |
| 9,10-Cl <sub>2</sub> PHE     | n.d.  | n.d.  | 0.265 | n.d.  | n.d.  | n.d.  | n.d. | n.d.  | n.d.  | n.d.  | 0    | 0.265 | n.d.   | 10     |
| 9,10-Cl <sub>2</sub> ANT     | n.d.  | n.d.  | 0.306 | n.d.  | n.d.  | n.d.  | n.d. | n.d.  | n.d.  | n.d.  | 0    | 0.306 | n.d.   | 10     |
| 1-ClPYR                      | n.d.  | n.d.  | n.d.  | n.d.  | n.d.  | n.d.  | n.d. | n.d.  | n.d.  | n.d.  | 0    | 0     | n.d.   | 0      |
| 1,5,9,10-Cl <sub>4</sub> ANT | n.d.  | n.d.  | n.d.  | n.d.  | n.d.  | n.d.  | n.d. | n.d.  | n.d.  | n.d.  | 0    | 0     | n.d.   | 0      |
| ΣCl-PAHs                     |       |       | 1.23  |       |       |       |      | 8.03  | 14.8  |       |      |       |        |        |

n.d. stands for not detected.

Table S11. Twenty-nine PACs identified by GC-Orbitrap-HRMS non-target screening analysis

| No.                 | Name                                          | Abbreviation  | CAS#       | Formula | RT<br>(min) | M.W.      | m/z       | Error<br>(ppm) | Structure                                                                             | ΔRI | SI  | Level |
|---------------------|-----------------------------------------------|---------------|------------|---------|-------------|-----------|-----------|----------------|---------------------------------------------------------------------------------------|-----|-----|-------|
| <b>Emerging PAH</b> |                                               |               |            |         |             |           |           |                |                                                                                       |     |     |       |
| 1                   | 4H-cyclopenta[def]phenanthrene                | 4H-CPPHE      | 203-64-5   | C15 H10 | 15.48       | 190.07770 | 190.07854 | 4.39338        | 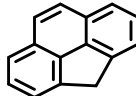   | 57  | 807 | 3     |
| 2                   | 7H-benzanthrene <sup>Δ</sup>                  | 7H-BEN        |            | C17 H12 | 19.97       | 216.09335 | 216.09395 | 2.75993        |    |     | 786 | 3     |
| 3                   | 7H-benzo[c]fluorene                           | 7H-BFLO       | 205-12-9   | C17 H12 | 20.37       | 216.09335 | 216.09373 | 1.77137        |    | 63  | 830 | 3     |
| 4                   | 3,4-dihydro-cyclopenta(cd)pyrene <sup>Δ</sup> | 3,4-DH-CP-PYR | 25732-74-5 | C18 H12 | 24.12       | 228.09335 | 228.09422 | 3.81887        |    |     | 779 | 3     |
| 5                   | 9H-cyclopenta[a]pyrene <sup>Δ</sup>           | 9H-CPPYR      | 50861-05-7 | C19 H12 | 25.87       | 240.09335 | 240.09378 | 1.78496        |   |     | 707 | 3     |
| <b>Phenyl-PAH</b>   |                                               |               |            |         |             |           |           |                |                                                                                       |     |     |       |
| 6                   | 9-phenyl-9H-fluorene                          | 9-Ph-9H-FLO   | 789-24-2   | C19 H14 | 25.92       | 242.10900 | 242.10956 | 2.29683        |  |     | 702 | 3     |
| 7                   | 2-phenyl-phenanthrene <sup>Δ</sup>            | 2-Ph-PHE      | 4325-77-3  | C20 H14 | 26.56       | 254.10900 | 254.10986 | 3.38933        |  |     | 881 | 3     |



| No.       | Name                                      | Abbreviation   | CAS#      | Formula   | RT<br>(min) | M.W.      | m/z       | Error<br>(ppm) | Structure                                                                             | ΔRI | SI  | Level |
|-----------|-------------------------------------------|----------------|-----------|-----------|-------------|-----------|-----------|----------------|---------------------------------------------------------------------------------------|-----|-----|-------|
| O-PAH     |                                           |                |           |           |             |           |           |                |                                                                                       |     |     |       |
| 8         | Phenol                                    | Phenol         | 108-95-2  | C6 H6 O   | 5.87        | 94.04131  | 94.04146  | 1.50731        | 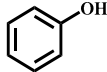   | 1   | 952 | 2b    |
| 9         | 7H-benz[de]anthracen-7-one                | 7H-BANT-7-O    | 82-05-3   | C17 H10 O | 23.05       | 230.07261 | 230.07339 | 3.38273        |    | 95  | 880 | 3     |
| Alkyl-PAH |                                           |                |           |           |             |           |           |                |                                                                                       |     |     |       |
| 10        | 1,3-diethyl-5-methyl-benzene <sup>Δ</sup> | 1,3-DE-5-MB    | 2050-24-0 | C11 H16   | 7.52        | 148.12465 | 148.12503 | 2.55485        |    | 3   | 803 | 2a    |
| 11        | 1,2,3,4-tetramethyl-naphthalene           | 1,2,3,4-TM-NAP | 3031-15-0 | C14 H16   | 12.88       | 184.12465 | 184.12518 | 2.88405        |    | 8   | 805 | 2b    |
| 12        | 9,9-dimethyl-9H-fluorene                  | 9,9-DM-9H-FLO  | 4569-45-3 | C15 H14   | 13.94       | 194.10900 | 194.10965 | 3.33646        |    |     | 823 | 3     |
| 13        | 2,5-dimethyl-phenanthrene                 | 2,5-DM-PHE     | 3674-66-6 | C16 H14   | 17.38       | 206.10900 | 206.10939 | 1.88365        |   |     | 884 | 3     |
| 14        | 7-methyl-benz[a]anthracene                | 7-M-BANT       | 2541-69-7 | C19 H14   | 25.72       | 242.10900 | 242.10971 | 2.92708        |  |     | 683 | 3     |
| 15        | 12-methyl-benz[a]anthracene <sup>Δ</sup>  | 12-M-BANT      | 2422-79-9 | C19 H14   | 26.11       | 242.10900 | 242.10950 | 2.04474        |  |     | 652 | 3     |
| PAO/SH    |                                           |                |           |           |             |           |           |                |                                                                                       |     |     |       |

| No.    | Name                                                                              | Abbreviation      | CAS#       | Formula    | RT<br>(min) | M.W.      | m/z       | Error<br>(ppm) | Structure                                                                             | ΔRI | SI  | Level |
|--------|-----------------------------------------------------------------------------------|-------------------|------------|------------|-------------|-----------|-----------|----------------|---------------------------------------------------------------------------------------|-----|-----|-------|
| 16     | 3,7-dimethyldibenzothiophene <sup>△</sup>                                         | DMDBT             | 1136-85-2  | C14 H12 S  | 15.99       | 212.06542 | 212.06613 | 3.34298        | 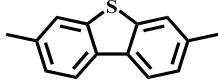   | 705 |     | 3     |
| 17     | 4b,10a-dihydro-<br>benzo[b]benzo[3,4]cyclobuta[1,2-<br>e][1,4]dioxin <sup>☆</sup> | DBBCD             | 42896-18-4 | C14 H10 O2 | 17.85       | 210.06753 | 210.06810 | 2.70805        |    | 603 |     | 3     |
| 18     | 2H-phenanthro[9,10-b]pyran <sup>△</sup>                                           | 2H-PHEP           | 217-67-4   | C17 H12 O  | 20.49       | 232.08826 | 232.08878 | 2.19345        |    | 886 |     | 3     |
| 19     | Benzo[b]naphtho[2,1-d]thiophene                                                   | BANPT             | 239-35-0   | C16 H10 S  | 22.60       | 234.04977 | 234.05037 | 2.54929        |    | 7   | 718 | 2b    |
| 20     | 1-phenyldibenzofuran                                                              | PhDBF             |            | C18 H12 O  | 23.57       | 244.08826 | 244.08894 | 2.77326        |    | 745 |     | 3     |
| Others |                                                                                   |                   |            |            |             |           |           |                |                                                                                       |     |     |       |
| 21     | Methyl salicylate <sup>△</sup>                                                    | Methyl salicylate | 119-36-8   | C8 H8 O3   | 7.96        | 152.04679 | 152.04718 | 2.52906        |   | 12  | 836 | 2b    |
| 22     | Methyl-3-phenylpropionate <sup>△</sup>                                            | M-PhPP            | 103-25-3   | C10 H12 O2 | 8.51        | 164.08318 | 164.08360 | 2.57031        |  | 4   | 854 | 2a    |
| 23     | 1,1'-[1,2-ethanediylbis(oxy)]bis-benzene                                          | EDB(O)BB          |            | C14 H14 O2 | 13.64       | 214.09883 | 214.09920 | 1.71027        |  | 725 |     | 3     |

| No. | Name                                                            | Abbreviation | CAS#       | Formula      | RT<br>(min) | M.W.      | m/z       | Error<br>(ppm) | Structure                                                                            | ΔRI | SI  | Level |
|-----|-----------------------------------------------------------------|--------------|------------|--------------|-------------|-----------|-----------|----------------|--------------------------------------------------------------------------------------|-----|-----|-------|
| 24  | 2,4-diphenyl-4-methyl-2(E)-<br>pentene <sup>△</sup>             | DPhMP        | 22768-22-5 | C18 H20      | 14.10       | 236.15595 | 236.15660 | 2.74713        | 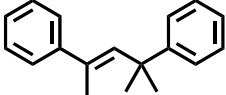  | 15  | 848 | 2a    |
| 25  | 5H-dibenzo[a,d]cycloheptene <sup>☆</sup>                        | 5H-DBCH      | 256-81-5   | C15 H12      | 15.11       | 192.09335 | 192.09396 | 3.18419        |   |     | 898 | 3     |
| 26  | N-phenyl-2-naphthalenamine                                      | N-Ph-NAPA    | 135-88-6   | C16 H13 N    | 20.23       | 219.10425 | 219.10466 | 1.86689        |   | 31  | 837 | 3     |
| 27  | 2,4-bis(1-methyl-1-phenylethyl)-<br>phenol                      | BMPhePh      | 2772-45-4  | C24 H26 O    | 24.36       | 330.19781 | 330.19891 | 3.32101        |   | 12  | 864 | 2a    |
| 28  | 9H-tribenzo[a,c,e]cycloheptene <sup>☆</sup>                     | 9H-TBCH      | 213-10-5   | C19 H14      | 25.57       | 242.10900 | 242.10954 | 2.23381        |   |     | 915 | 3     |
| 29  | 2-(2H-benzotriazol-2-yl)-4,6-<br>bis(1,1-dimethylpropyl)-phenol | BTBDMPPh     |            | C22 H29 N3 O | 26.55       | 351.23051 | 351.23135 | 2.39070        |  |     | 721 | 3     |

Abbreviations: M.W.= Molecular Weight; Phenyl-PAH= Phenyl PAH; O-PAH= Oxidized PAH; Alkyl-PAH= Alkylated PAH; PAOH= Oxygen/Sulfur-containing heterocyclic PAH; Others= Other aromatic contaminants; ΔRI= Retention index delta between base compound and library hit; SI= Library Search Index; level= Confidence level;

The calculation and definition methods for RI and level refer to Text S3;

<sup>△</sup>: first report in dust environment;

<sup>☆</sup>: first report in environment matrix.

Table S12. The LC<sub>50</sub> (mg/L) of target and screening abbreviations for soil organisms (earthworm) and aquatic organisms (fish).

| Abbreviation | SMILES                                                           | LC <sub>50</sub> (mg/L) |            |
|--------------|------------------------------------------------------------------|-------------------------|------------|
|              |                                                                  | Earthworm (14d)         | Fish (96h) |
| NAP          | <chem>C1=CC=C2C=CC=CC2=C1</chem>                                 | 169                     | 9.39       |
| ACY          | <chem>C1=CC2=C3C(=C1)C=CC3=CC=C2</chem>                          | 167                     | 2.28       |
| ACE          | <chem>C1CC2=CC=CC3=C2C1=CC=C3</chem>                             | 160                     | 1.48       |
| FLO          | <chem>C1C2=CC=CC=C2C3=CC=CC=C31</chem>                           | 179                     | 2.11       |
| PHE          | <chem>C1=CC=C2C(=C1)C=CC3=CC=CC=C32</chem>                       | 177                     | 1.15       |
| ANT          | <chem>C1=CC=C2C=C3C=CC=CC3=CC2=C1</chem>                         | 177                     | 1.15       |
| FLT          | <chem>C1=CC=C2C(=C1)C3=CC=CC4=C3C2=CC=C4</chem>                  | 175                     | 0.386      |
| PYR          | <chem>C1=CC2=C3C(=C1)C=CC4=CC=CC(=C43)C=C2</chem>                | 175                     | 0.386      |
| BaA          | <chem>C1=CC=C2C(=C1)C=CC3=CC4=CC=CC=C4C=C32</chem>               | 171                     | 0.129      |
| CHR          | <chem>C1=CC=C2C(=C1)C=CC3=C2C=CC4=CC=CC=C43</chem>               | 171                     | 0.129      |
| BbF          | <chem>C1=CC=C2C3=C4C(=CC=C3)C5=CC=CC=C5C4=CC2=C1</chem>          | 164                     | 0.042      |
| BkF          | <chem>C1=CC=C2C=C3C4=CC=CC5=C4C(=CC=C5)C3=CC2=C1</chem>          | 164                     | 0.042      |
| BaP          | <chem>C1=CC=C2C3=C4C(=CC2=C1)C=CC5=C4C(=CC=C5)C=C3</chem>        | 164                     | 0.042      |
| IcdP         | <chem>C1=CC=C2C(=C1)C3=C4C2=CC5=CC=CC6=C5C4=C(C=C6)C=C3</chem>   | 157                     | 0.014      |
| DahA         | <chem>C1=CC=C2C(=C1)C=CC3=CC4=C(C=CC5=CC=CC=C54)C=C32</chem>     | 158                     | 0.014      |
| BghiP        | <chem>C1=CC2=C3C(=C1)C4=CC=CC5=C4C6=C(C=C5)C=CC(=C36)C=C2</chem> | 157                     | 0.014      |
| NAP-1-ALD    | <chem>C1=CC=C2C(=C1)C=CC=C2C=O</chem>                            | 220                     | 20.5       |
| 9-FLO        | <chem>C1=CC=C2C(=C1)C3=CC=CC=C3C2=O</chem>                       | 216                     | 5.99       |
| ATQ          | <chem>C1=CC=C2C(=C1)C(=O)C3=CC=CC=C3C2=O</chem>                  | 263                     | 10.6       |
| PHE-9-ALD    | <chem>C1=CC=C2C(=C1)C=C(C3=CC=CC=C3)C=O</chem>                   | 219                     | 2.38       |
| BZO          | <chem>C1=CC=C2C(=C1)C3=CC=CC4=C3C(=CC=C4)C2=O</chem>             | 209                     | 0.673      |
| 1N-NAP       | <chem>C1=CC=C2C(=C1)C=CC=C2[N+](=O)[O-]</chem>                   | 238                     | 18.5       |

| Abbreviation            | SMILES                                                           | LC <sub>50</sub> (mg/L) |            |
|-------------------------|------------------------------------------------------------------|-------------------------|------------|
|                         |                                                                  | Earthworm (14d)         | Fish (96h) |
| 2N-NAP                  | <chem>C1=CC=C2C=C(C=CC2=C1)[N+](=O)[O-]</chem>                   | 238                     | 18.5       |
| 5N-ACE                  | <chem>C1CC2=CC=C(C3=CC=CC1=C23)[N+](=O)[O-]</chem>               | 216                     | 2.79       |
| 2N-FLU                  | <chem>C1C2=CC=CC=C2C3=C1C=C(C=C3)[N+](=O)[O-]</chem>             | 237                     | 3.92       |
| 9N-ANT                  | <chem>C1=CC=C2C(=C1)C=C3C=CC=CC3=C2[N+](=O)[O-]</chem>           | 232                     | 2.09       |
| 3N-FLT                  | <chem>O=N(=O)C2CCC3C1CCCCC1C4CCCC2C34</chem>                     | 224                     | 0.44       |
| 1N-PYR                  | <chem>C1=CC2=C3C(=C1)C=CC4=C(C=CC(=C43)C=C2)[N+](=O)[O-]</chem>  | 223                     | 0.688      |
| 7N-BaA                  | <chem>C1=CC=C2C(=C1)C=CC3=C(C4=CC=CC=C4C=C32)[N+](=O)[O-]</chem> | 214                     | 0.225      |
| 6N-CHR                  | <chem>C1=CC=C2C(=C1)C=CC3=C2C=C(C4=CC=CC=C43)[N+](=O)[O-]</chem> | 214                     | 0.225      |
| 5-BrACE                 | <chem>C1CC2=CC=C(C3=CC=CC1=C23)Br</chem>                         | 196                     | 0.356      |
| 1-BrANT                 | <chem>C1=CC=C2C=C3C(=CC2=C1)C=CC=C3Br</chem>                     | 206                     | 0.263      |
| 9-BrPHE                 | <chem>C1=CC=C2C(=C1)C=C(C3=CC=CC=C23)Br</chem>                   | 206                     | 0.263      |
| 3-BrPHE                 | <chem>C1=CC=C2C(=C1)C=CC3=C2C=C(C=C3)Br</chem>                   | 206                     | 0.263      |
| 2-BrPHE                 | <chem>C1=CC=C2C(=C1)C=CC3=C2C=CC(=C3)Br</chem>                   | 206                     | 0.263      |
| 2,7-Br <sub>2</sub> FLU | <chem>C1C2=C(C=CC(=C2)Br)C3=C1C=C(C=C3)Br</chem>                 | 228                     | 0.104      |
| 3-BrFLT                 | <chem>C1=CC=C2C(=C1)C3=C4C2=CC=CC4=C(C=C3)Br</chem>              | 196                     | 0.085      |
| 1,8-Br <sub>2</sub> ANT | <chem>C1=CC2=CC3=C(C=C2C(=C1)Br)C(=CC=C3)Br</chem>               | 218                     | 0.054      |
| 1-BrPYR                 | <chem>C1=CC2=C3C(=C1)C=CC4=C(C=CC(=C43)C=C2)Br</chem>            | 196                     | 0.085      |
| 2-BrTriPH               | <chem>C1=CC=C2C(=C1)C3=C(C=C(C=C3)Br)C4=CC=CC=C24</chem>         | 186                     | 0.028      |
| 1,6-Br <sub>2</sub> PYR | <chem>C1=CC2=C(C=CC3=C2C4=C1C=CC(=C4C=C3)Br)Br</chem>            | 203                     | 0.017      |
| 7-BrBaA                 | <chem>C1=CC=C2C(=C1)C=CC3=C(C4=CC=CC=C4C=C32)Br</chem>           | 186                     | 0.028      |
| 6-BrBaP                 | <chem>C1=CC=C2C(=C1)C3=C4C(=C2Br)C=CC5=CC=CC(=C54)C=C3</chem>    | 175                     | 0.0088     |
| 9-ClANT                 | <chem>C1=CC=C2C(=C1)C=C3C=CC=CC3=C2Cl</chem>                     | 181                     | 0.361      |
| 9-ClPHE                 | <chem>C1=CC=C2C(=C1)C=C(C3=CC=CC=C23)Cl</chem>                   | 181                     | 0.361      |
| 2,7-Cl <sub>2</sub> FLU | <chem>C1C2=C(C=CC(=C2)Cl)C3=C1C=C(C=C3)Cl</chem>                 | 186                     | 0.208      |

|    | Abbreviation                 | SMILES                                                   | LC <sub>50</sub> (mg/L) |            |
|----|------------------------------|----------------------------------------------------------|-------------------------|------------|
|    |                              |                                                          | Earthworm (14d)         | Fish (96h) |
|    | 9,10-Cl <sub>2</sub> PHE     | <chem>C1=CC=C2C(=C1)C3=CC=CC=C3C(=C2Cl)Cl</chem>         | 180                     | 0.111      |
|    | 9,10-Cl <sub>2</sub> ANT     | <chem>C1=CC=C2C(=C1)C(=C3C=CC=CC3=C2Cl)Cl</chem>         | 180                     | 0.111      |
|    | 1-CIPYR                      | <chem>C1=CC2=C3C(=C1)C=CC4=C(C=CC(=C43)C=C2)Cl</chem>    | 175                     | 0.119      |
|    | 1,5,9,10-Cl <sub>4</sub> ANT | <chem>C1=CC2=C(C(=C1)Cl)C(=C3C=CC=C(C3=C2Cl)Cl)Cl</chem> | 170                     | 0.0098     |
| 1  | 4H-CPPHE                     | <chem>C1C2=CC=CC3=C2C4=C(C=CC=C41)C=C3</chem>            | 178                     | 0.717      |
| 2  | 7H-BEN                       | <chem>C1C2=CC=CC=C2C3=CC=CC4=C3C1=CC=C4</chem>           | 175                     | 0.242      |
| 3  | 7H-BFLO                      | <chem>C1C2=C(C3=CC=CC=C31)C4=CC=CC=C4C=C2</chem>         | 175                     | 0.242      |
| 4  | 3,4-DH-CP-PYR                | <chem>C1CC2=CC3=CC=CC4=C3C5=C(C=CC1=C25)C=C4</chem>      | 156                     | 0.057      |
| 5  | 9H-CPPYR                     | <chem>C1C=CC2=C1C3=C4C(=C2)C=CC5=C4C(=CC=C5)C=C3</chem>  | 154                     | 0.034      |
| 6  | 9-Ph-9H-FLO                  | <chem>C1=CC=C(C=C1)C2C3=CC=CC=C3C4=CC=CC=C24</chem>      | 189                     | 0.189      |
| 7  | 2-Ph-PHE                     | <chem>C1=CC=C(C=C1)C2=CC3=C(C=C2)C4=CC=CC=C4C=C3</chem>  | 166                     | 0.043      |
| 8  | Phenol                       | <chem>C1=CC=C(C=C1)O</chem>                              | 184                     | 212        |
| 9  | 7H-BANT-7-O                  | <chem>C1=CC=C2C(=C1)C3=CC=CC4=C3C(=CC=C4)C2=O</chem>     | 209                     | 0.673      |
| 10 | 1,3-DE-5-MB                  | <chem>CCC1=CC(=CC(=C1)C)CC</chem>                        | 138                     | 0.543      |
| 11 | 1,2,3,4-TM-NAP               | <chem>CC1=C(C2=CC=CC=C2C(=C1C)C)C</chem>                 | 144                     | 0.146      |
| 12 | 9,9-DM-9H-FLO                | <chem>CC1(C2=CC=CC=C2C3=CC=CC=C31)C</chem>               | 181                     | 0.733      |
| 13 | 2,5-DM-PHE                   | <chem>CC1(C2=CC=CC=C2C3=CC=CC=C31)C</chem>               | 181                     | 0.138      |
| 14 | 7-M-BANT                     | <chem>CC1=C2C=CC3=CC=CC=C3C2=CC4=CC=CC=C14</chem>        | 159                     | 0.044      |
| 15 | 12-M-BANT                    | <chem>CC1=C2C(=CC3=CC=CC=C13)C=CC4=CC=CC=C42</chem>      | 159                     | 0.044      |
| 16 | DMDBT                        | <chem>CC1=CC2=C(C=C1)C3=C(S2)C=C(C=C3)C</chem>           | 169                     | 0.206      |
| 17 | DBBCD                        | <chem>C1=CC=C2C3C(C2=C1)OC4=CC=CC=C4O3</chem>            | 274                     | 14.3       |
| 18 | 2H-PHEP                      | <chem>C1C=CC2=C(O1)C3=CC=CC=C3C4=CC=CC=C24</chem>        | 191                     | 0.291      |
| 19 | BANPT                        | <chem>C1=CC=C2C(=C1)C=CC3=C2SC4=CC=CC=C34</chem>         | 183                     | 0.192      |

|    | Abbreviation      | SMILES                                                             | LC <sub>50</sub> (mg/L) |            |
|----|-------------------|--------------------------------------------------------------------|-------------------------|------------|
|    |                   |                                                                    | Earthworm (14d)         | Fish (96h) |
| 20 | PhDBF             | <chem>C1=CC=C(C=C1)C2=C3C4=CC=CC=C4OC3=CC=C2</chem>                | 185                     | 0.151      |
| 21 | Methyl salicylate | <chem>COC(=O)C1=CC=CC=C1O</chem>                                   | 229                     | 35.9       |
| 22 | M-PhPP            | <chem>COC(=O)CCC1=CC=CC=C1</chem>                                  | 249                     | 41.3       |
| 23 | EDB(O)BB          | <chem>C1=CC=C(C=C1)OCCOC2=CC=CC=C2</chem>                          | 242                     | 4.20       |
| 24 | DPhMP             | <chem>C/C(=C/C(C)(C)C1=CC=CC=C1)/C2=CC=CC=C2</chem>                | 143                     | 0.020      |
| 25 | 5H-DBCH           | <chem>C1C2=CC=CC=C2C=CC3=CC=CC=C31</chem>                          | 172                     | 0.50       |
| 26 | N-Ph-NAPA         | <chem>C1=CC=C(C=C1)NC2=CC3=CC=CC=C3C=C2</chem>                     | 212                     | 1.10       |
| 27 | BMPhePh           | <chem>CC(C)(C1=CC=CC=C1)C2=CC(=C(C=C2)O)C(C)(C)C3=CC=CC=C3</chem>  | 186                     | 0.015      |
| 28 | 9H-TBCH           | <chem>C12=CC=CC=C1C1=CC=CC=C1C1=CC=CC=C1C2</chem>                  | 171                     | 0.08       |
| 29 | BTBDMPPh          | <chem>CCC(C)(C)C1=CC(=C(C(=C1)N2N=C3C=CC=CC3=N2)O)C(C)(C)CC</chem> | 174                     | 0.0055     |

Table S13. TEQs for target contaminants.

| Contaminant | D-1         | D-2         | D-3      | D-4      | D-5      | D-6      | D-7      | D-8         | D-9      | D-10     |
|-------------|-------------|-------------|----------|----------|----------|----------|----------|-------------|----------|----------|
| NAP         | 2.51E-04    | 1.82E-04    | 6.60E-06 | 2.61E-04 | 1.57E-05 | 8.24E-05 | 1.31E-04 | 2.48E-04    | 3.46E-05 | 1.49E-04 |
| ACY         | 0           | 0           | 2.35E-06 | 0        | 6.88E-07 | 0        | 0        | 0           | 1.21E-05 | 0        |
| ACE         | 7.36E-05    | 3.77E-05    | 8.46E-07 | 3.26E-05 | 2.56E-06 | 2.45E-05 | 3.24E-05 | 2.96E-05    | 1.71E-05 | 1.96E-05 |
| FLO         | 1.91E-05    | 3.78E-05    | 3.98E-05 | 1.81E-05 | 1.90E-05 | 7.64E-06 | 1.84E-05 | 3.05E-05    | 2.95E-05 | 9.98E-06 |
| PHE         | 5.44E-05    | 4.70E-05    | 1.50E-05 | 8.48E-05 | 1.08E-05 | 1.06E-04 | 1.83E-04 | 1.52E-04    | 1.81E-04 | 1.51E-05 |
| ANT         | 1.29E-04    | 1.14E-04    | 1.46E-05 | 1.54E-04 | 1.01E-05 | 1.87E-04 | 2.79E-04 | 2.29E-04    | 2.95E-04 | 7.58E-05 |
| FLT         | 5.15E-05    | 0           | 1.63E-05 | 5.77E-05 | 0        | 1.21E-04 | 0        | 1.19E-04    | 1.42E-04 | 4.30E-06 |
| PYR         | 4.48E-05    | 5.71E-06    | 1.45E-05 | 6.26E-05 | 6.09E-06 | 1.24E-04 | 1.24E-04 | 1.29E-04    | 2.23E-04 | 1.09E-05 |
| BaA         | 1.28E-03    | 2.85E-04    | 1.60E-05 | 1.67E-03 | 0        | 2.32E-03 | 5.08E-05 | 1.79E-03    | 1.51E-03 | 2.56E-04 |
| CHR         | 4.43E-04    | 0           | 1.02E-04 | 3.80E-04 | 3.12E-05 | 5.84E-04 | 6.97E-04 | 4.81E-04    | 1.60E-03 | 3.82E-05 |
| BbF         | 3.70E-03    | 0           | 5.62E-04 | 0        | 3.38E-04 | 5.73E-03 | 6.87E-03 | 5.99E-03    | 0        | 4.31E-04 |
| BkF         | 1.75E-03    | 8.41E-04    | 8.48E-04 | 1.17E-03 | 3.87E-04 | 2.63E-03 | 2.95E-03 | 1.85E-03    | 1.45E-03 | 9.15E-04 |
| BaP         | 1.55E-02    | 5.74E-03    | 4.72E-03 | 1.51E-01 | 2.56E-03 | 3.12E-02 | 3.12E-02 | 2.69E-02    | 4.10E-03 | 5.11E-03 |
| IcdP        | 3.56E-03    | 1.81E-03    | 0        | 3.07E-03 | 2.64E-04 | 4.65E-03 | 5.28E-03 | 4.59E-03    | 2.15E-03 | 2.19E-03 |
| BghiP       | 7.79E-05    | 5.84E-05    | 0        | 2.93E-04 | 3.85E-05 | 3.62E-04 | 4.51E-04 | 4.35E-04    | 5.63E-05 | 1.00E-04 |
| ΣPAHs       | 2.69E-02    | 9.16E-03    | 6.35E-03 | 1.58E-01 | 3.69E-03 | 4.81E-02 | 4.83E-02 | 4.30E-02    | 1.18E-02 | 9.32E-03 |
| NAP-1-ALD   | 0           | 0           | 0        | 0        | 0        | 0        | 0        | 0           | 0        | 0        |
| 9-FLO       | 5.90E-05    | 3.94E-05    | 5.47E-06 | 6.03E-05 | 3.42E-06 | 6.65E-05 | 1.36E-04 | 1.33E-04    | 5.66E-05 | 2.23E-05 |
| ATQ         | 0           | 0           | 0        | 0        | 0        | 0        | 0        | 0           | 0        | 0        |
| PHE-9-ALD   | 0           | 0           | 0        | 0        | 0        | 0        | 0        | 0           | 0        | 0        |
| BZO         | 1.79361E-05 | 0           | 1.80E-04 | 0        | 1.46E-05 | 2.39E-04 | 1.00E-04 | 9.00861E-05 | 0        | 0        |
| ΣO-PAHs     | 7.68861E-05 | 3.94E-05    | 1.86E-04 | 6.03E-05 | 1.80E-05 | 3.05E-04 | 2.36E-04 | 2.23E-04    | 5.66E-05 | 2.23E-05 |
| 1N-NAP      | 0           | 0           | 0        | 0        | 0        | 0        | 0        | 0           | 0        | 0        |
| 2N-NAP      | 0           | 0           | 0        | 0        | 0        | 0        | 0        | 0           | 0        | 0        |
| 5N-ACE      | 6.60E-04    | 1.02E-03    | 0        | 5.57E-04 | 1.68E-05 | 0        | 6.77E-04 | 6.37E-04    | 1.29E-03 | 0        |
| 2N-FLU      | 3.61E-04    | 2.74E-04    | 0        | 9.51E-04 | 0        | 1.48E-04 | 5.09E-05 | 1.47E-04    | 7.82E-04 | 2.64E-04 |
| 3N-FLT      | 1.74408E-05 | 1.89462E-05 | 0        | 0        | 0        | 4.98E-05 | 1.86E-05 | 2.02E-05    | 1.63E-05 | 1.09E-05 |
| 1N-PYR      | 1.35E-03    | 4.17E-03    | 9.57E-05 | 7.63E-04 | 0        | 1.18E-03 | 2.00E-04 | 1.59E-03    | 9.00E-04 | 6.99E-04 |
| 6N-CHR      | 0           | 0           | 0        | 9.21E-02 | 0        | 0        | 5.01E-02 | 0           | 3.79E-02 | 2.60E-02 |
| ΣN-PAHs     | 2.39E-03    | 5.49E-03    | 9.57E-05 | 9.44E-02 | 1.68E-05 | 1.38E-03 | 5.10E-02 | 2.39E-03    | 4.09E-02 | 2.69E-02 |



| Contaminant              | D-1      | D-2      | D-3      | D-4 | D-5      | D-6      | D-7      | D-8      | D-9      | D-10     |
|--------------------------|----------|----------|----------|-----|----------|----------|----------|----------|----------|----------|
| 5-BrACE                  | 0        | 0        | 0        | 0   | 0        | 0        | 0        | 0        | 0        | 0        |
| 3-BrFLT                  | 0        | 0        | 0        | 0   | 0        | 0        | 0        | 0        | 0        | 0        |
| 1,8-Br <sub>2</sub> ANT  | 0        | 0        | 0        | 0   | 0        | 0        | 0        | 0        | 0        | 0        |
| 1,6-Br <sub>2</sub> PYR  | 0        | 0        | 0        | 0   | 0        | 0        | 0        | 0        | 0        | 0        |
| 7-BrBaA                  | 6.14E-04 | 8.91E-04 | 1.37E-02 | 0   | 9.46E-03 | 1.60E-02 | 1.72E-02 | 1.13E-02 | 3.68E-03 | 1.39E-03 |
| 6-BrBaP                  | 0        | 0        | 0        | 0   | 0        | 0        | 0        | 0        | 0        | 0        |
| ΣBr-PAHs                 | 6.14E-04 | 8.91E-04 | 1.37E-02 | 0   | 9.46E-03 | 1.60E-02 | 1.72E-02 | 1.13E-02 | 3.68E-03 | 1.39E-03 |
| 9-ClANT                  | 0        | 0        | 0        | 0   | 0        | 0        | 0        | 0        | 0        | 0        |
| 9-ClPHE                  | 0        | 0        | 0        | 0   | 0        | 0        | 0        | 2.41E-04 | 2.78E-04 | 0        |
| 9,10-Cl <sub>2</sub> PHE | 0        | 0        | 0        | 0   | 0        | 0        | 0        | 0        | 0        | 0        |
| 9,10-Cl <sub>2</sub> ANT | 0        | 0        | 6.12E-05 | 0   | 0        | 0        | 0        | 0        | 0        | 0        |
| ΣCl-PAHs                 | 0        | 0        | 6.12E-05 | 0   | 0        | 0        | 0        | 2.41E-04 | 2.78E-04 | 0        |

Table S14. The results of ILCR analysis.

|          |        | CS       | Adults                    |                            |                        |          | Children                  |                            |                        |          |
|----------|--------|----------|---------------------------|----------------------------|------------------------|----------|---------------------------|----------------------------|------------------------|----------|
|          |        |          | ILCR <sub>Ingestion</sub> | ILCR <sub>Inhalation</sub> | ILCR <sub>Dermal</sub> | ILCRs    | ILCR <sub>Ingestion</sub> | ILCR <sub>Inhalation</sub> | ILCR <sub>Dermal</sub> | ILCRs    |
| ΣPAHs    | MIN    | 3.69E-03 | 7.09E-09                  | 5.50E-13                   | 3.60E-08               | 4.30E-08 | 9.89E-09                  | 1.92E-13                   | 4.32E-09               | 1.42E-08 |
|          | MAX    | 1.58E-01 | 3.05E-07                  | 2.36E-11                   | 1.55E-06               | 1.85E-06 | 4.25E-07                  | 8.24E-12                   | 1.86E-07               | 6.11E-07 |
|          | Mean   | 3.65E-02 | 7.02E-08                  | 5.44E-12                   | 3.56E-07               | 4.26E-07 | 9.80E-08                  | 1.90E-12                   | 4.27E-08               | 1.41E-07 |
|          | Median | 1.93E-02 | 3.72E-08                  | 2.88E-12                   | 1.89E-07               | 2.26E-07 | 5.19E-08                  | 1.01E-12                   | 2.27E-08               | 7.46E-08 |
| ΣO-PAHs  | MIN    | 1.80E-05 | 3.46E-11                  | 2.69E-15                   | 1.76E-10               | 2.10E-10 | 4.83E-11                  | 9.37E-16                   | 2.11E-11               | 6.94E-11 |
|          | MAX    | 3.05E-04 | 5.87E-10                  | 4.55E-14                   | 2.98E-09               | 3.56E-09 | 8.19E-10                  | 1.59E-14                   | 3.57E-10               | 1.18E-09 |
|          | Mean   | 1.22E-04 | 2.35E-10                  | 1.82E-14                   | 1.19E-09               | 1.43E-09 | 3.28E-10                  | 6.37E-15                   | 1.43E-10               | 4.72E-10 |
|          | Median | 6.86E-05 | 1.32E-10                  | 1.02E-14                   | 6.69E-10               | 8.01E-10 | 1.84E-10                  | 3.57E-15                   | 8.04E-11               | 2.65E-10 |
| ΣN-PAHs  | MIN    | 1.68E-05 | 3.23E-11                  | 2.51E-15                   | 1.64E-10               | 1.96E-10 | 4.52E-11                  | 8.75E-16                   | 1.97E-11               | 6.49E-11 |
|          | MAX    | 9.44E-02 | 1.81E-07                  | 1.41E-11                   | 9.21E-07               | 1.10E-06 | 2.53E-07                  | 4.91E-12                   | 1.11E-07               | 3.64E-07 |
|          | Mean   | 2.25E-02 | 4.32E-08                  | 3.35E-12                   | 2.20E-07               | 2.63E-07 | 6.04E-08                  | 1.17E-12                   | 2.63E-08               | 8.67E-08 |
|          | Median | 3.94E-03 | 7.57E-09                  | 5.87E-13                   | 3.84E-08               | 4.60E-08 | 1.06E-08                  | 2.05E-13                   | 4.61E-09               | 1.52E-08 |
| ΣBr-PAHs | MIN    | 0        | 0                         | 0                          | 0                      | 0        | 0                         | 0                          | 0                      | 0        |
|          | MAX    | 1.72E-02 | 3.30E-08                  | 2.56E-12                   | 1.67E-07               | 2.00E-07 | 4.61E-08                  | 8.93E-13                   | 2.01E-08               | 6.62E-08 |
|          | Mean   | 7.42E-03 | 1.43E-08                  | 1.11E-12                   | 7.24E-08               | 8.66E-08 | 1.99E-08                  | 3.86E-13                   | 8.69E-09               | 2.86E-08 |
|          | Median | 6.57E-03 | 1.26E-08                  | 9.79E-13                   | 6.41E-08               | 7.67E-08 | 1.76E-08                  | 3.42E-13                   | 7.69E-09               | 2.53E-08 |
| ΣCl-PAHs | MIN    | 0        | 0                         | 0                          | 0                      | 0        | 0                         | 0                          | 0                      | 0        |
|          | MAX    | 2.78E-04 | 5.34E-10                  | 4.14E-14                   | 2.71E-09               | 3.25E-09 | 7.46E-10                  | 1.45E-14                   | 3.25E-10               | 1.07E-09 |
|          | Mean   | 5.80E-05 | 1.11E-10                  | 8.65E-15                   | 5.66E-10               | 6.77E-10 | 1.56E-10                  | 3.02E-15                   | 6.79E-11               | 2.24E-10 |
|          | Median | 0        | 0                         | 0                          | 0                      | 0        | 0                         | 0                          | 0                      | 0        |
| ΣAll     | MIN    | 1.32E-02 | 2.53E-08                  | 1.97E-12                   | 1.29E-07               | 1.54E-07 | 3.54E-08                  | 6.86E-13                   | 1.54E-08               | 5.08E-08 |
|          | MAX    | 2.53E-01 | 4.86E-07                  | 3.77E-11                   | 2.47E-06               | 2.95E-06 | 6.79E-07                  | 1.32E-11                   | 2.96E-07               | 9.75E-07 |
|          | Mean   | 6.66E-02 | 1.28E-07                  | 9.93E-12                   | 6.50E-07               | 7.78E-07 | 1.79E-07                  | 3.47E-12                   | 7.80E-08               | 2.57E-07 |
|          | Median | 4.72E-02 | 9.07E-08                  | 7.03E-12                   | 4.60E-07               | 5.51E-07 | 1.27E-07                  | 2.45E-12                   | 5.52E-08               | 1.82E-07 |

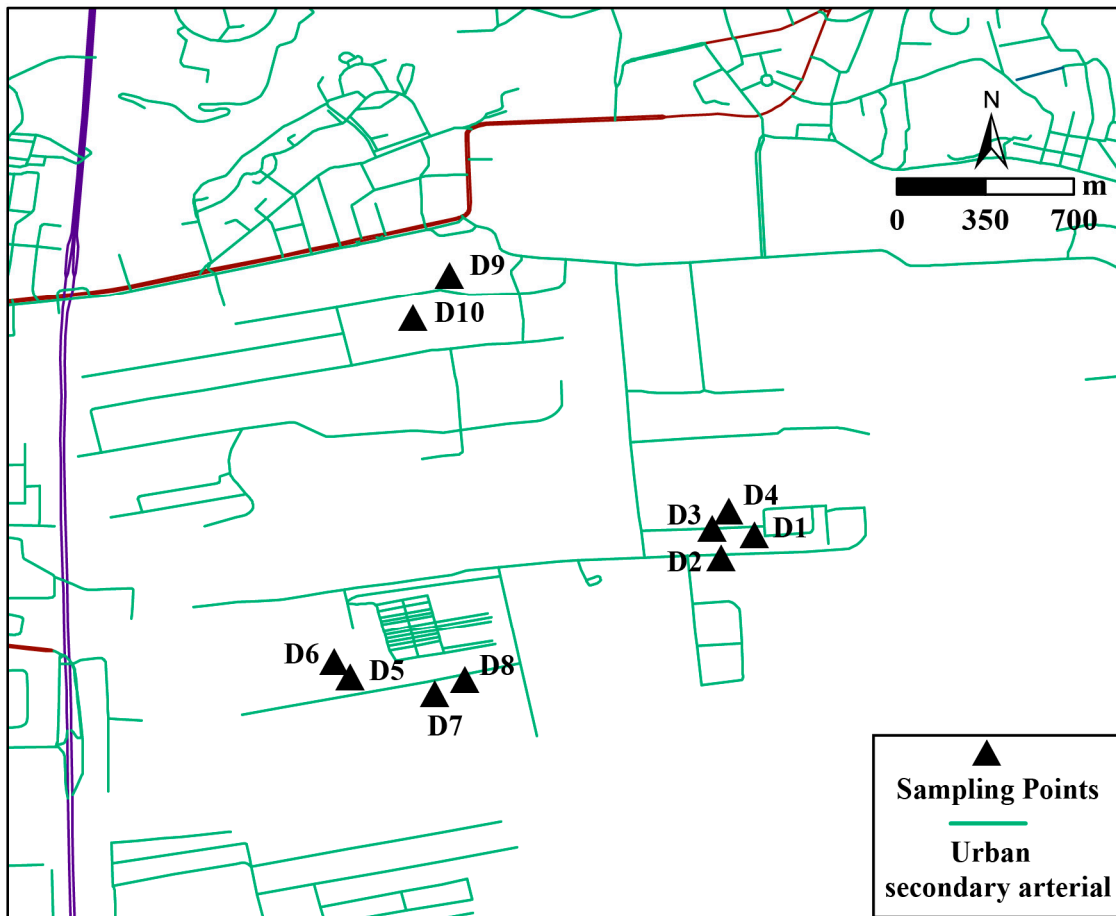

Figure S1. The sampling sites distribution.

Figure S2. Chromatogram (left) and mass spectrum (right) of 29 identified PACs.

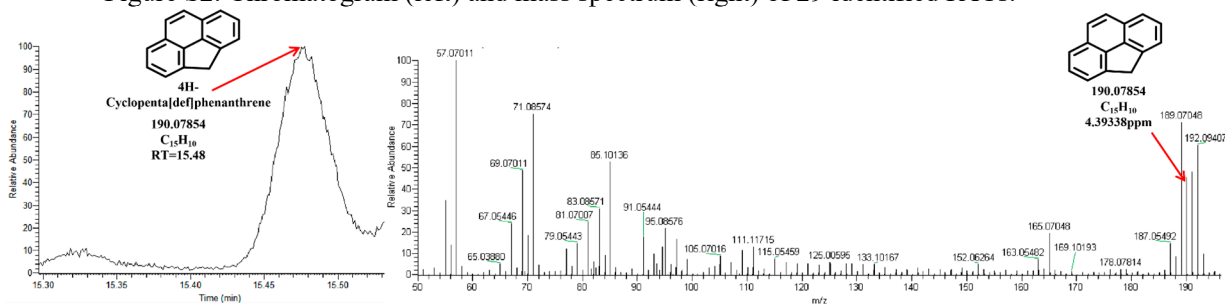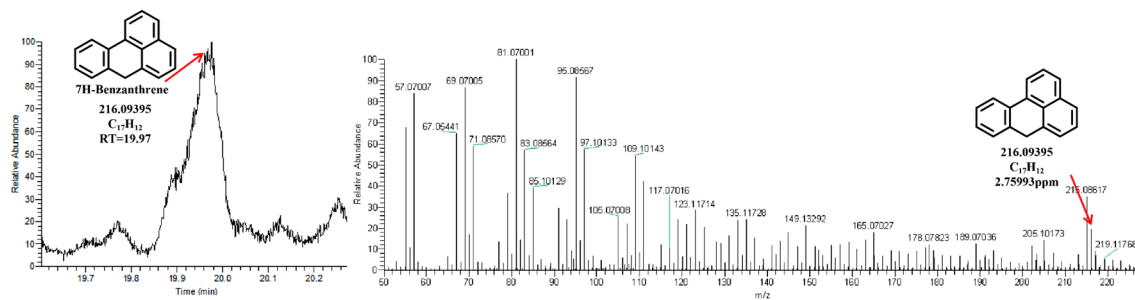

Figure S2-2. 7H-benzanthrene

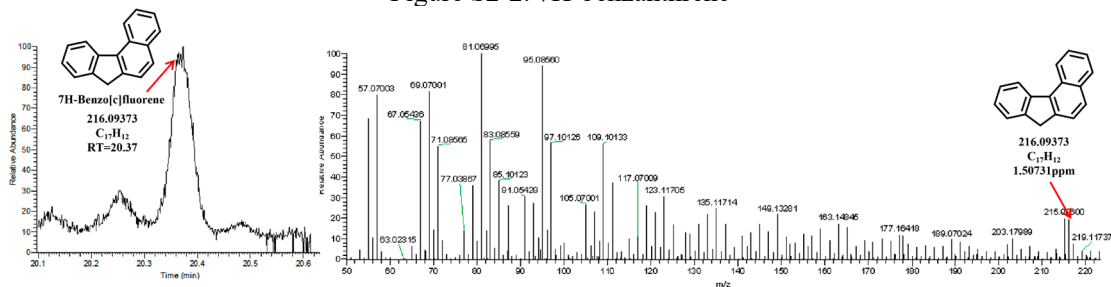

Figure S2-3. 7H-benzo[c]fluorene

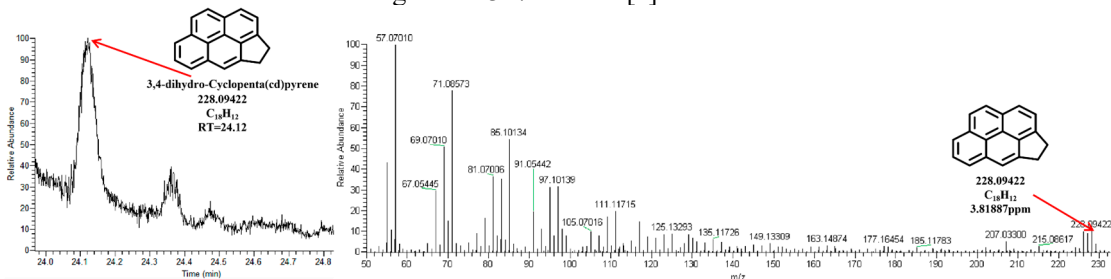

Figure S2-4. 3,4-dihydro-cyclopenta(cd)pyrene

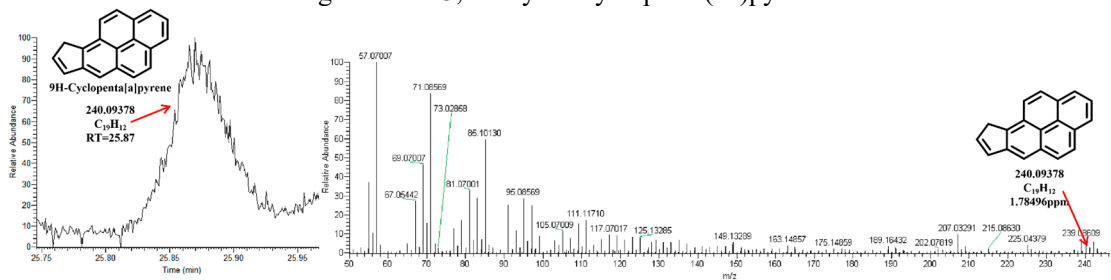

Figure S2-5. 9H-cyclopenta[a]pyrene

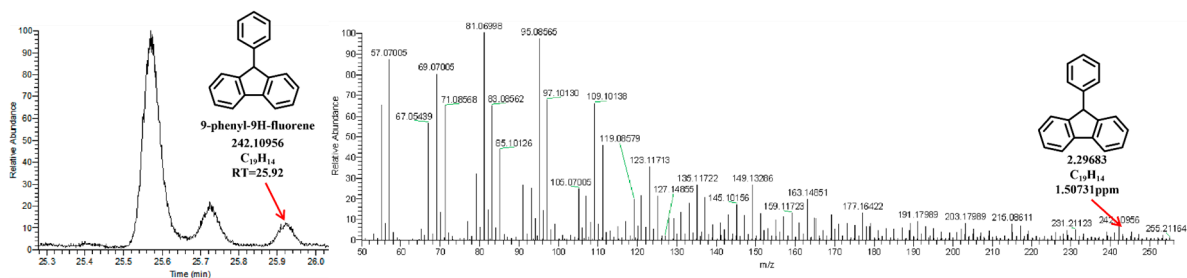

Figure S2-6. 9-phenyl-9H-fluorene

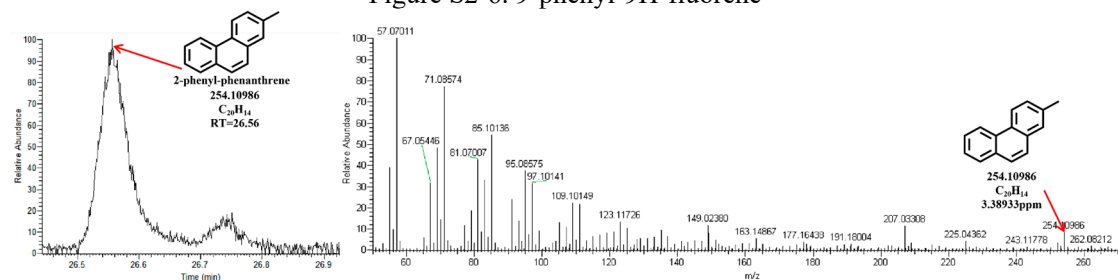

Figure S2-7. 2-phenyl-phenanthrene

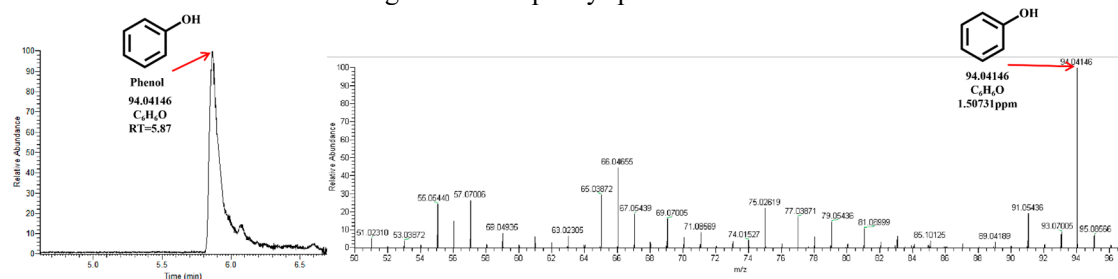

Figure S2-8. Phenol

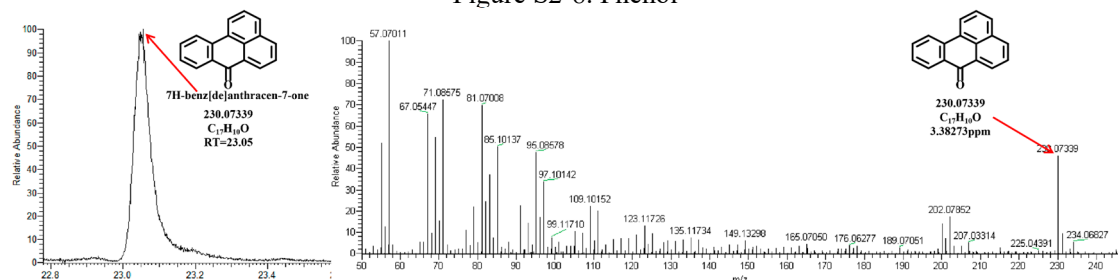

Figure S2-9. 7H-benz[de]anthracen-7-one

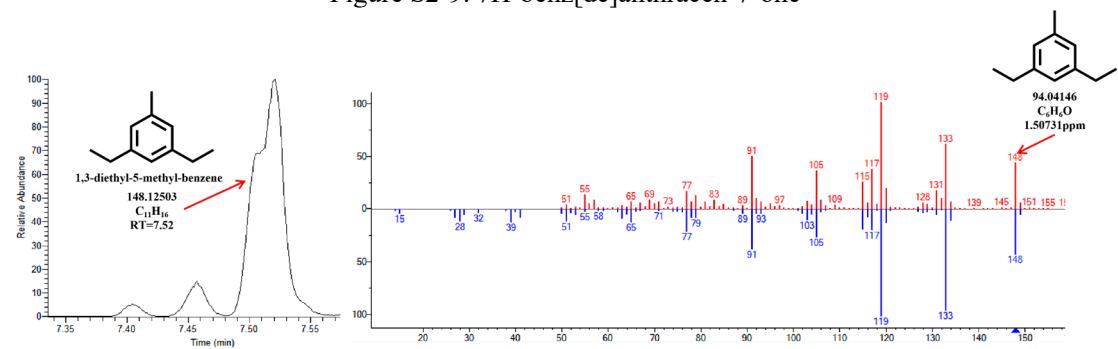

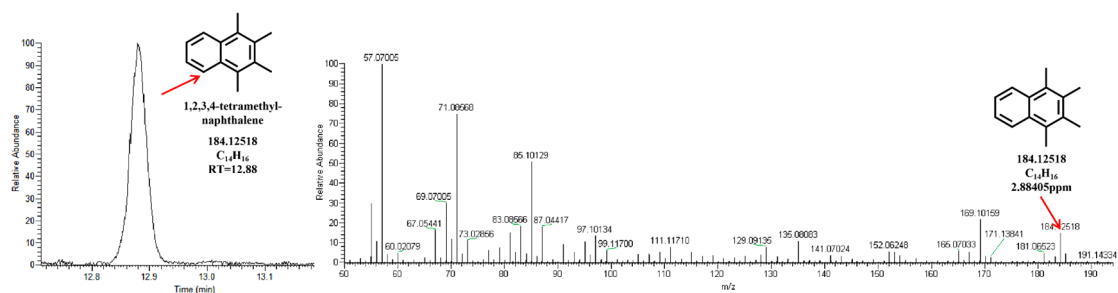

Figure S2-11. 1,2,3,4-tetramethyl-naphthalene

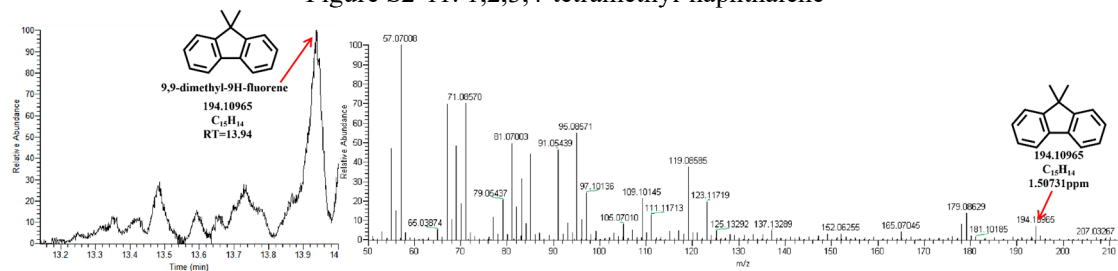

Figure S2-12. 9,9-dimethyl-9H-fluorene

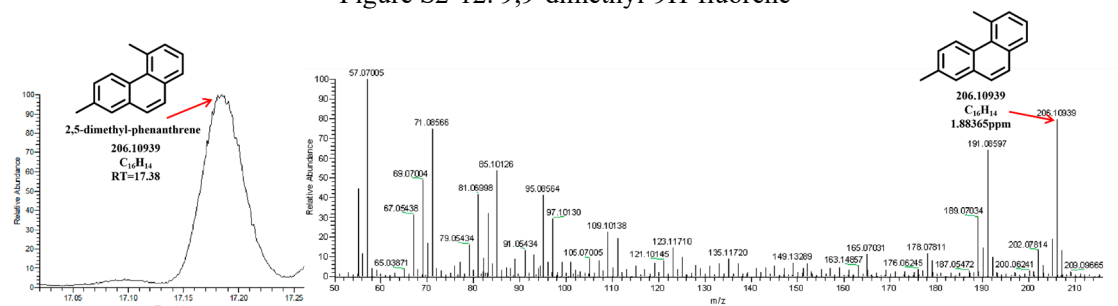

Figure S2-13. 2,5-dimethyl-phenanthrene

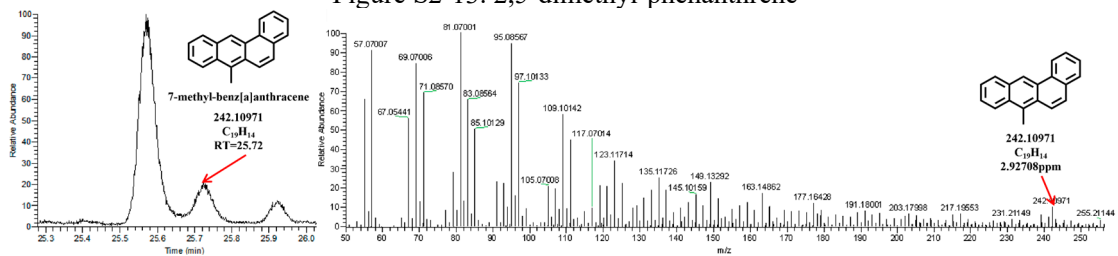

Figure S2-14. 7-methyl-benz[a]anthracene

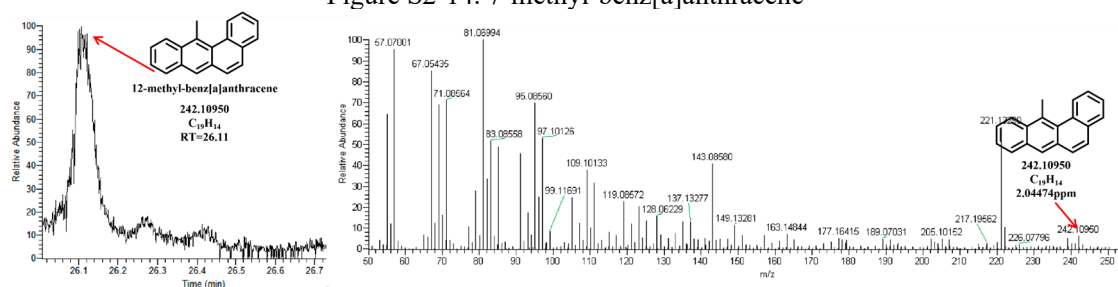

Figure S2-15. 12-methyl-benz[a]anthracene

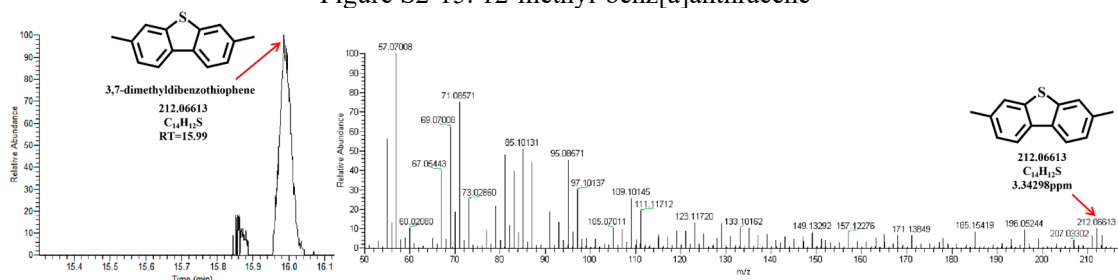

Figure S2-16. 3,7-dimethyldibenzothiophene

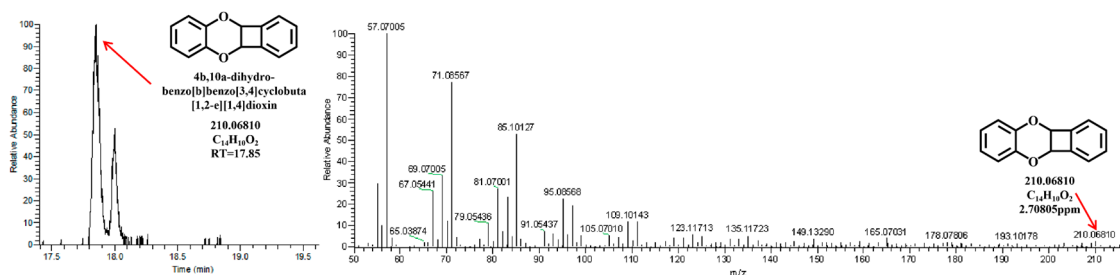

Figure S2-17. 4b,10a-dihydro-benzo[b]benzo[3,4]cyclobuta[1,2-e][1,4]dioxin

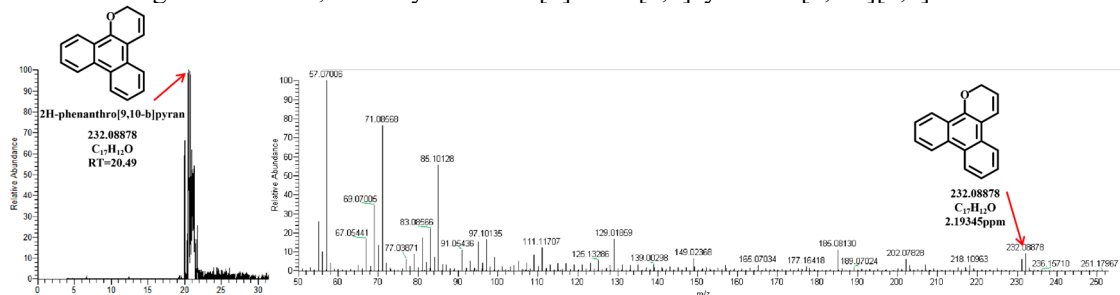

Figure S2-18. 2H-phenanthro[9,10-b]pyran

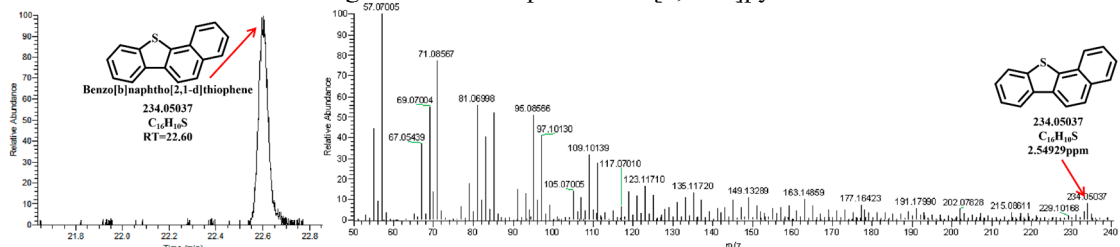

Figure S2-20. 1-phenyldibenzofuran

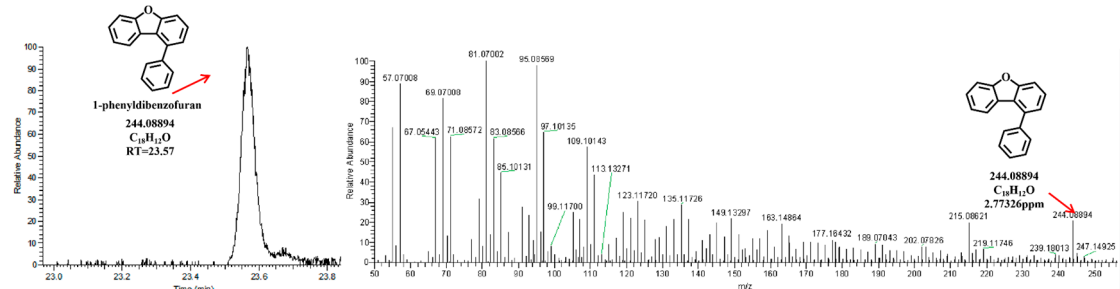

Figure S2-20. 1-phenyldibenzofuran

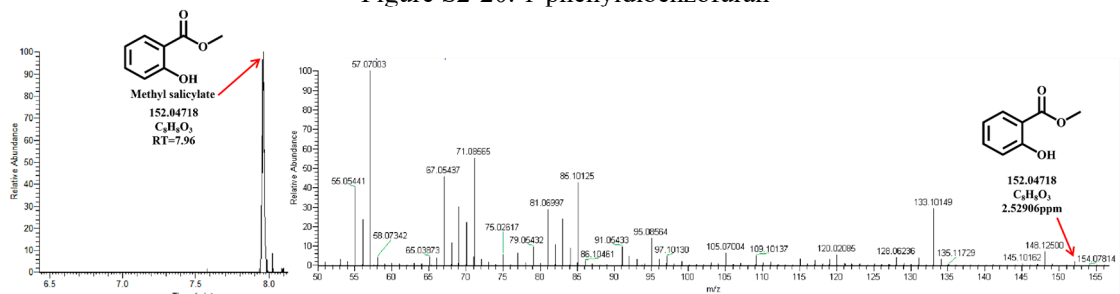

Figure S2-21. Methyl salicylate

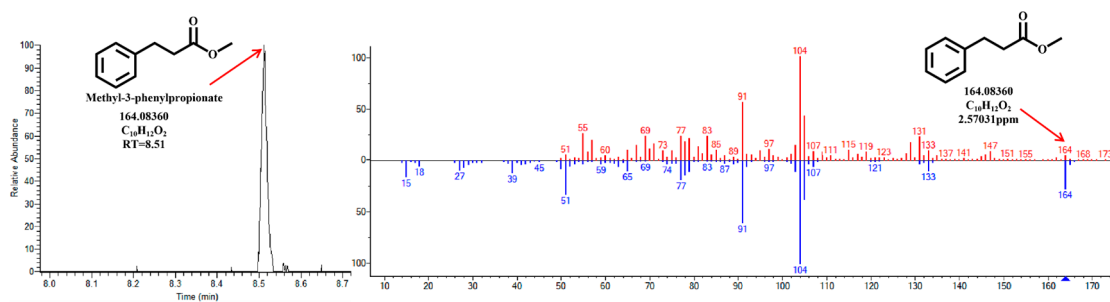

Figure S2-22. Methyl-3-phenylpropionate

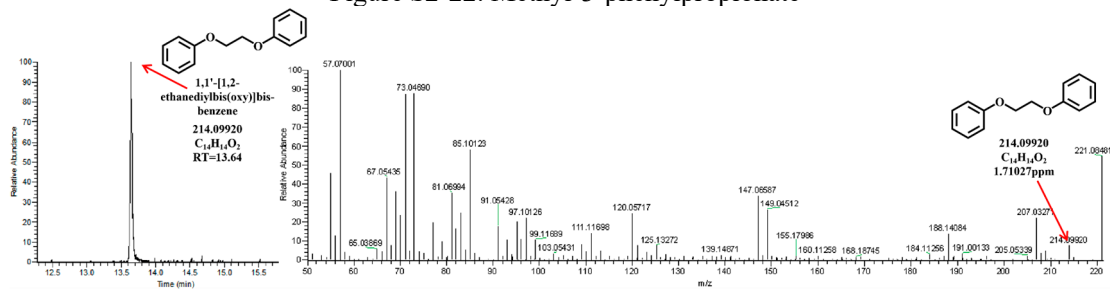

Figure S2-23. 1,1'-[1,2-ethanediylbis(oxy)]bis-benzene

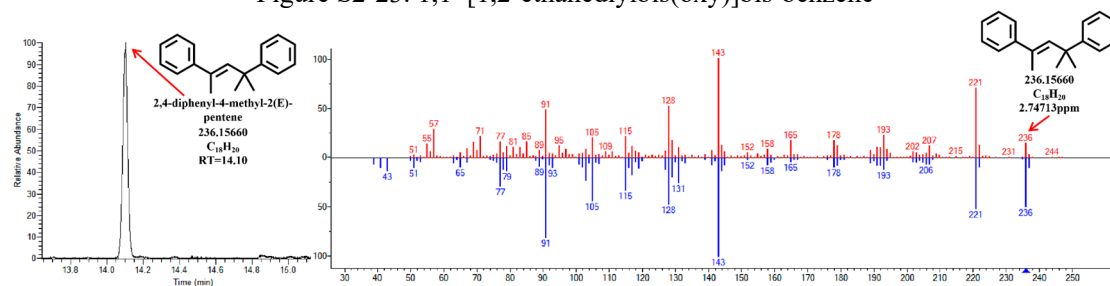

Figure S2-24. 2,4-diphenyl-4-methyl-2(E)-pentene

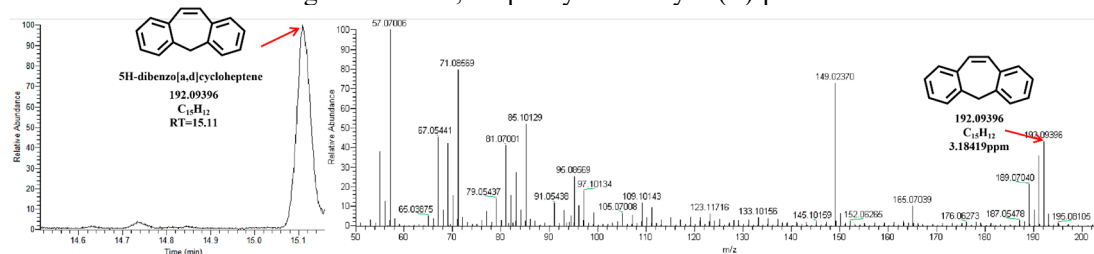

Figure S2-25. 5H-dibenzo[a,d]cycloheptene

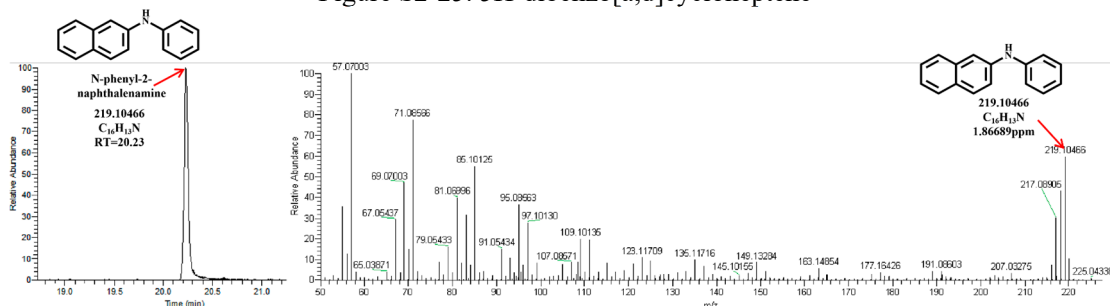

Figure S2-26. N-phenyl-2-naphthalenamine



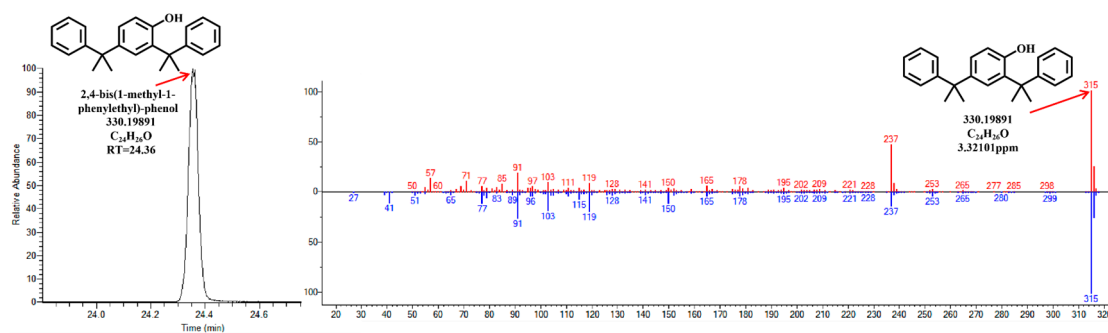

Figure S2-27. 2,4-bis(1-methyl-1-phenylethyl)-phenol

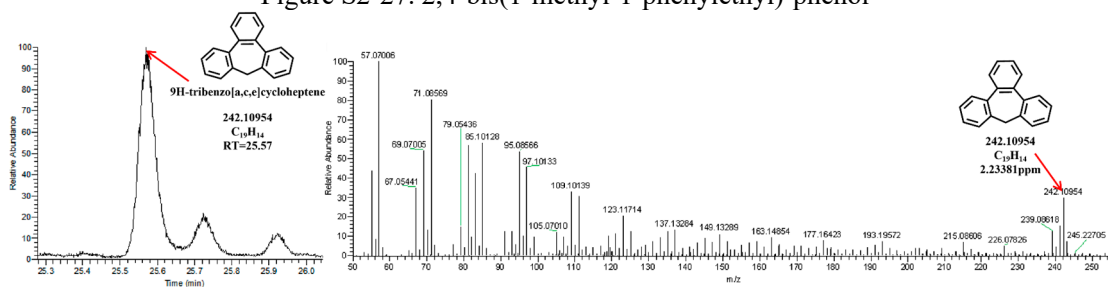

Figure S2-28. 9H-tribenzo[a,c,e]cycloheptene

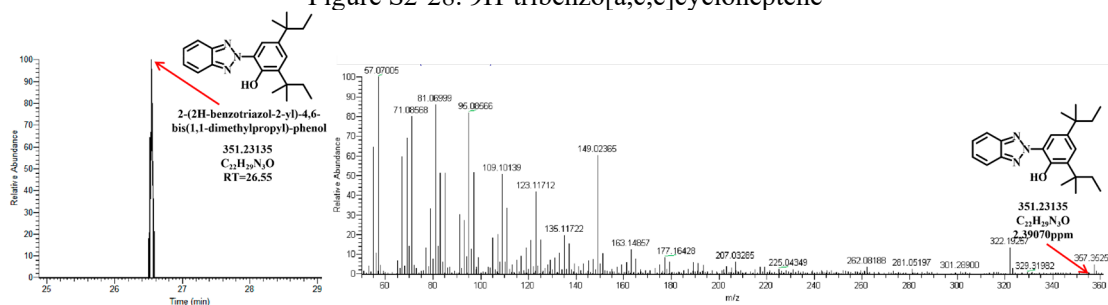

Figure S2-29. 2-(2H-benzotriazol-2-yl)-4,6-bis(1,1-dimethylpropyl)-phenol

## References

1. Wang, L.; Wang, L.; Tao, W.; Smardon, R.C.; Shi, X.; Lu, X. Characteristics, sources, and health risk of polycyclic aromatic hydrocarbons in urban surface dust: a case study of the city of Xi'an in Northwest China. *Environmental Science and Pollution Research* **2016**, *23*, 13389-13402.
2. Yu, Y.; Wang, X.; Wang, B.; Tao, S.; Liu, W.; Wang, X.; Cao, J.; Li, B.; Lu, X.; Wong, M.H. Polycyclic aromatic hydrocarbon residues in human milk, placenta, and umbilical cord blood in Beijing, China. *Environmental science & technology* **2011**, *45*, 10235-10242.
3. Kong, J.; Yan, S.; Cao, X.; Zhang, Y.; Ran, C.; Chen, X.; Yang, S.; Li, S.; Zhang, L.; He, H. Quantitative source apportionment and health risk assessment for polycyclic aromatic hydrocarbon and their derivatives in indoor dust from housing and public buildings of a mega-city in China. *Journal of Hazardous Materials* **2025**, *486*, doi:10.1016/j.jhazmat.2024.137057.
4. Jiang, P.; Yang, L.; Chen, X.; Gao, Y.; Li, Y.; Zhang, J.; Zhao, T.; Yu, H.; Wang, W. Impact of dust storms on NPAHs and OPAHs in PM<sub>2.5</sub> in Jinan, China, in spring 2016: Concentrations, health risks, and sources. *Aerosol and Air Quality Research* **2018**, *18*, 471-484.
5. Ali, N. Polycyclic aromatic hydrocarbons (PAHs) in indoor air and dust samples of different Saudi microenvironments; health and carcinogenic risk assessment for the general population. *Science of the Total Environment* **2019**, *696*, 133995.
6. UNDP. International Human Development Index Ghana. **2012**.
7. Ferreira-Baptista, L.; Miguel, E.D. Geochemistry and risk assessment of street dust in Luanda, Angola: A tropical urban environment. *Atmospheric Environment* **2005**, *39*, 4501-4512.
8. U.S.EPA. Supplemental guidance for developing soil screening levels for superfund sites. Office of Solid Waste and Emergency Response (OSWER). **2001**.
9. Wei, C.; Bandowe, B.A.M.; Han, Y.; Cao, J.; Zhan, C.; Wilcke, W. Polycyclic aromatic hydrocarbons (PAHs) and their derivatives (alkyl-PAHs, oxygenated-PAHs, nitrated-PAHs and azaarenes) in urban road dusts from Xi'an, Central China. *Chemosphere* **2015**, *134*, 512-520.
10. Eilen A. Vik, G.B., Terje Farestveit (Grøner AS), and others. Guidelines for the risk assessment of contaminated sites. **1999**.
11. U.S.EPA. Exposure factors handbook. *Office of research and Development, Washington, DC* **2011**, 20460, 2-6.
